# Supplementary material for: Aryl bismuth phosphinates [BiAr2(O(O)PRR′)]: structure–activity relationships for antibacterial activity and cytotoxicity
Source: Royal Society of Chemistry journal article supplement (doi:10.1039/d2dt00346e), 2022-01-01
Supplement: d2dt00346e1.pdf [file d2dt00346e1.pdf]

## Supplementary Information

### **Aryl bismuth phosphinates [BiAr<sub>2</sub>(O(O)PRR')]: structure-activity relationships for antibacterial activity and cytotoxicity**

Megan E. Herdman, Melissa V. Werrett and Philip C. Andrews

School of Chemistry, Monash University, Clayton, Melbourne, VIC 3800, Australia.

#### **Contents**

Scheme S1 and S2 – Trialled reaction schemes to make [Bi(*o*-tol)<sub>2</sub>L] and [Bi(*p*-MeOPh)<sub>2</sub>L]

Figures S1 – S24 – <sup>1</sup>H NMR and <sup>31</sup>P NMR spectra for complexes **1** – **12**.

Table S1 – Summary of IR, melting and decomposition points for complexes **1** – **12**.

Figures S25 and S26 – Example TGA trace for complexes **4** and **8**.

Figures S27 – S29 – Crystallographic images of complexes **8**, **10** and **11**.

Table S2 – MICs of BiAr<sub>3</sub> compounds.

Figure S30 and S31 – Cos-7 viability of complexes **1** – **12** and BiAr<sub>3</sub> compounds.

Table S3 – Summary of crystallographic data for complexes **4**, **7**, **8**, **10** and **11**.

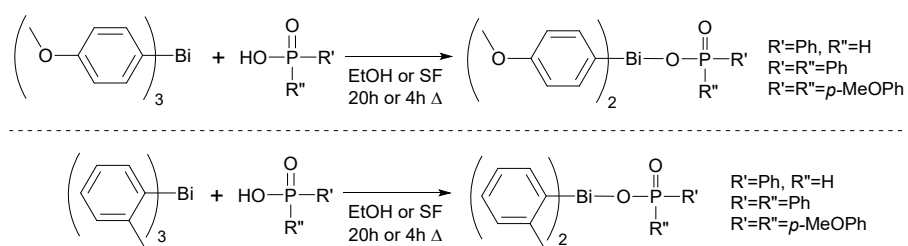

**Scheme S1** Attempted solvent mediated and solvent free routes to form diaryl bismuth *mono*-phosphinato complexes.

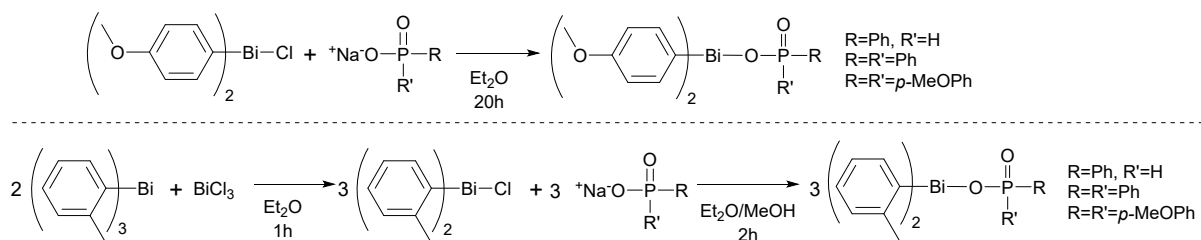

**Scheme S2** Attempted salt metathesis route to form diaryl bismuth *mono*-phosphinato complexes.

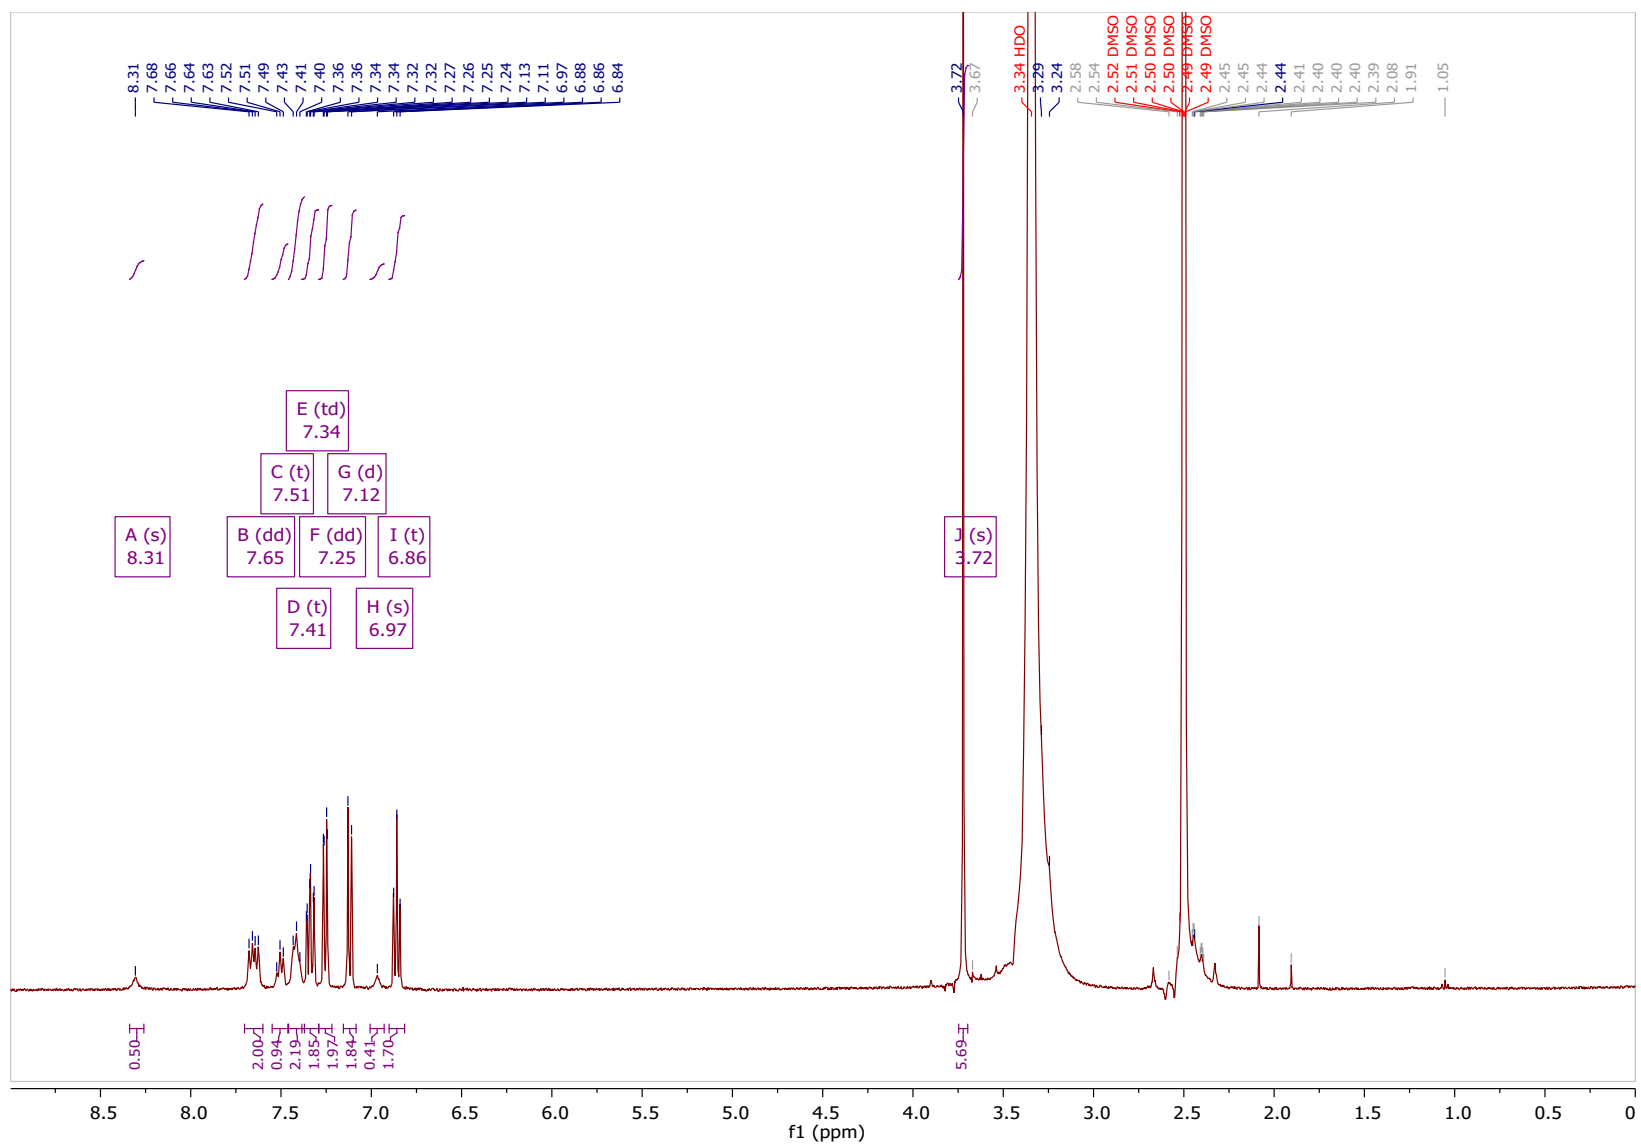

Figure S1 <sup>1</sup>H NMR spectrum of complex [Bi(o-MeOPh)<sub>2</sub>(O(O)P(H)Ph)]<sub>n</sub> **1** in d<sub>6</sub>-DMSO.

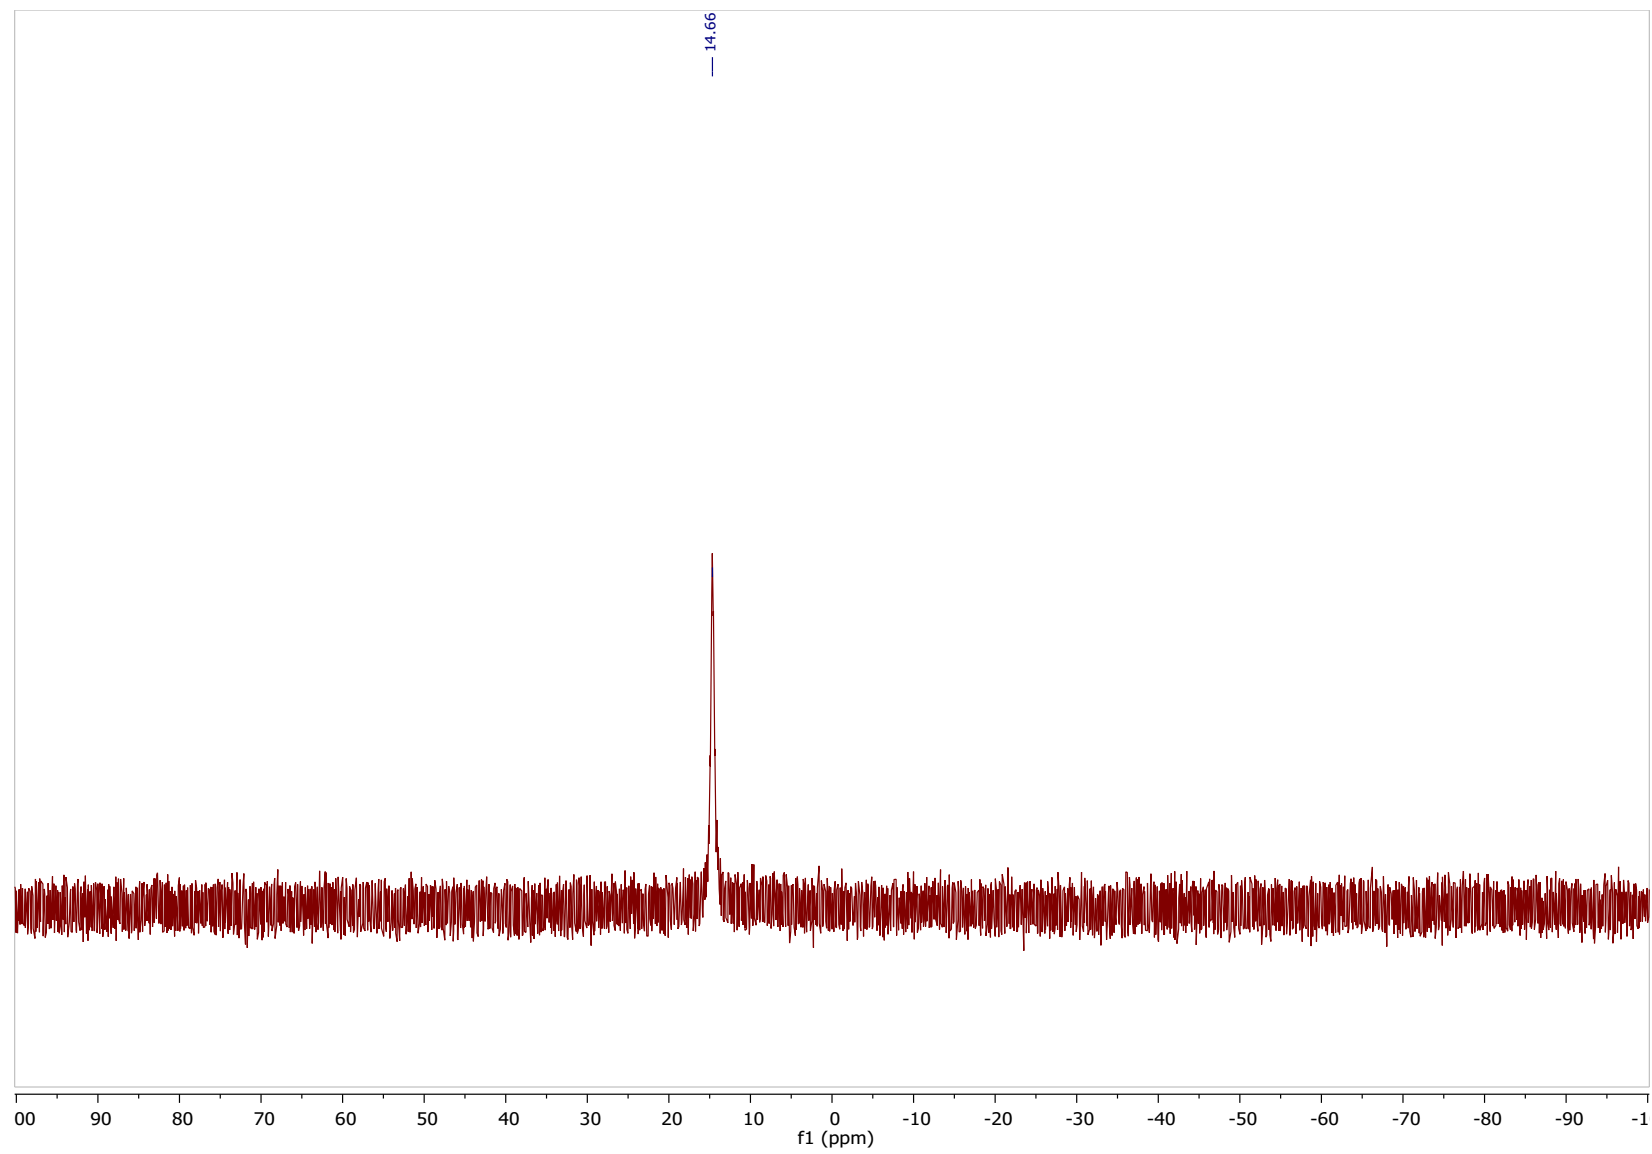

**Figure S2**  $^{31}\text{P}$  NMR spectrum of complex  $[\text{Bi}(\text{o-MeOPh})_2(\text{O}(\text{O})\text{P}(\text{H})\text{Ph})]_n$  **1** in  $\text{d}_6$ -DMSO.

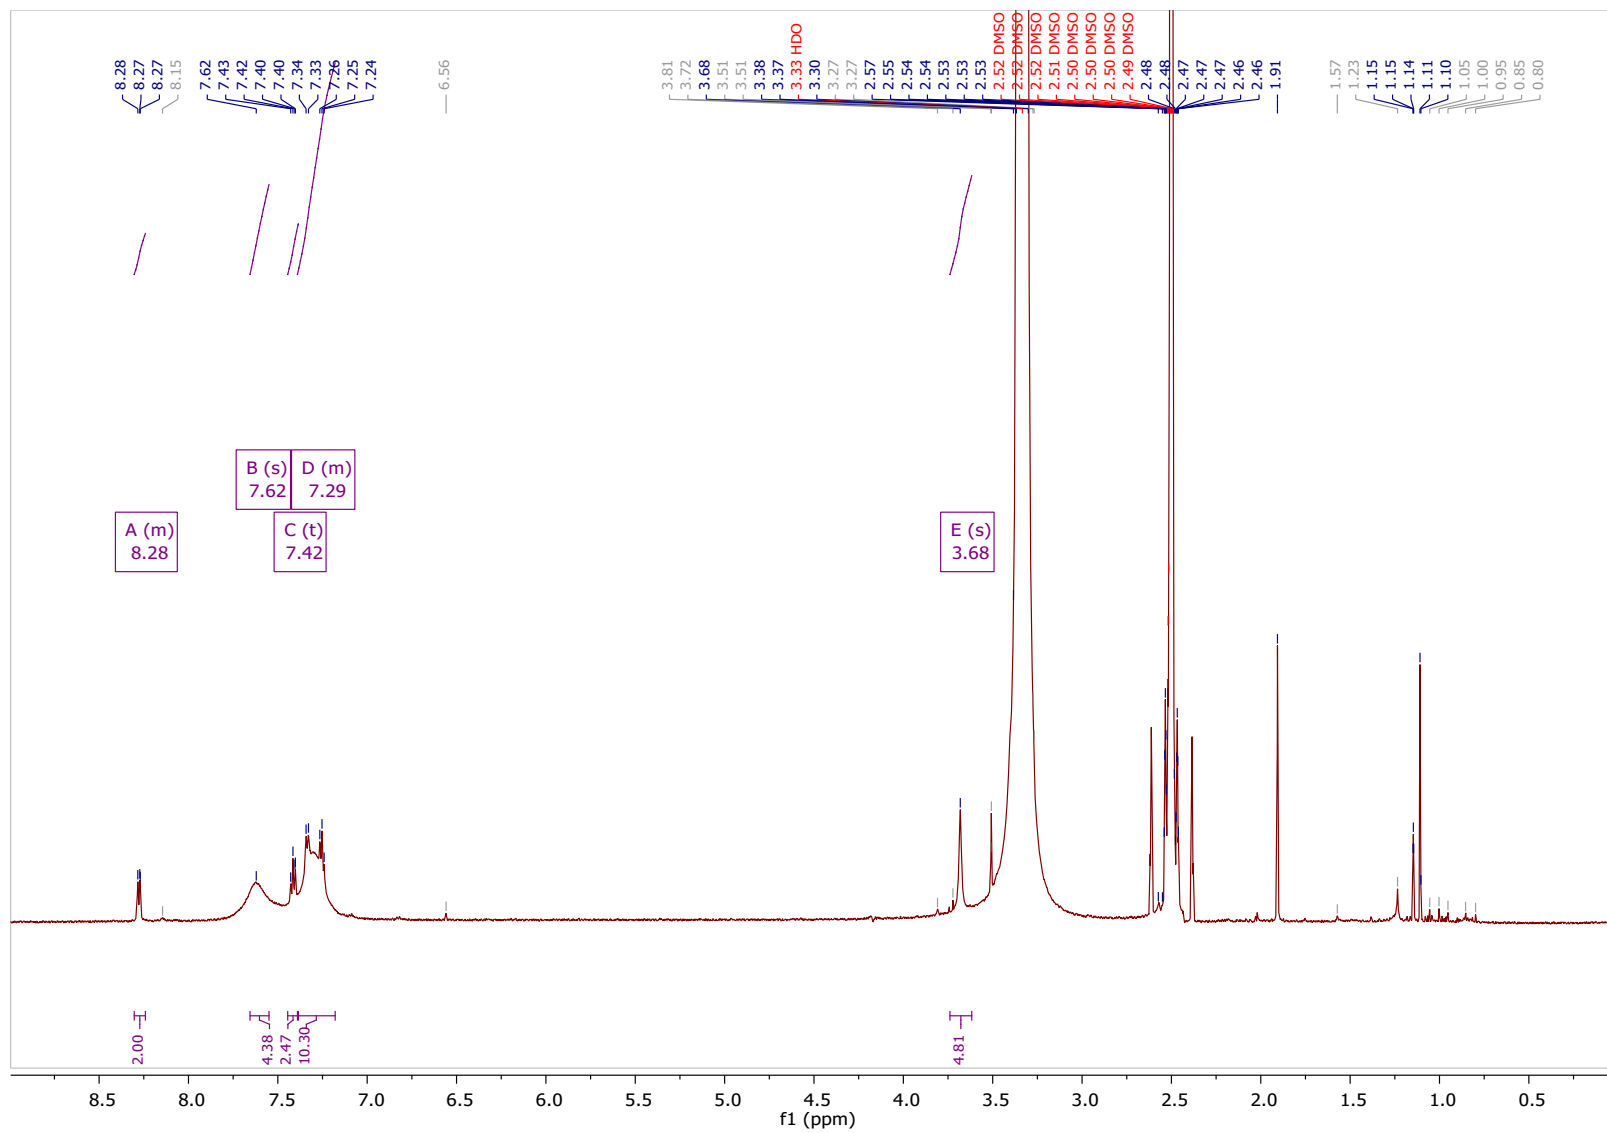

Figure S3 <sup>1</sup>H NMR spectrum of complex [Bi(o-MeOPh)<sub>2</sub>(O(O)PPh<sub>2</sub>)]<sub>n</sub> 2 in d<sub>6</sub>-DMSO.

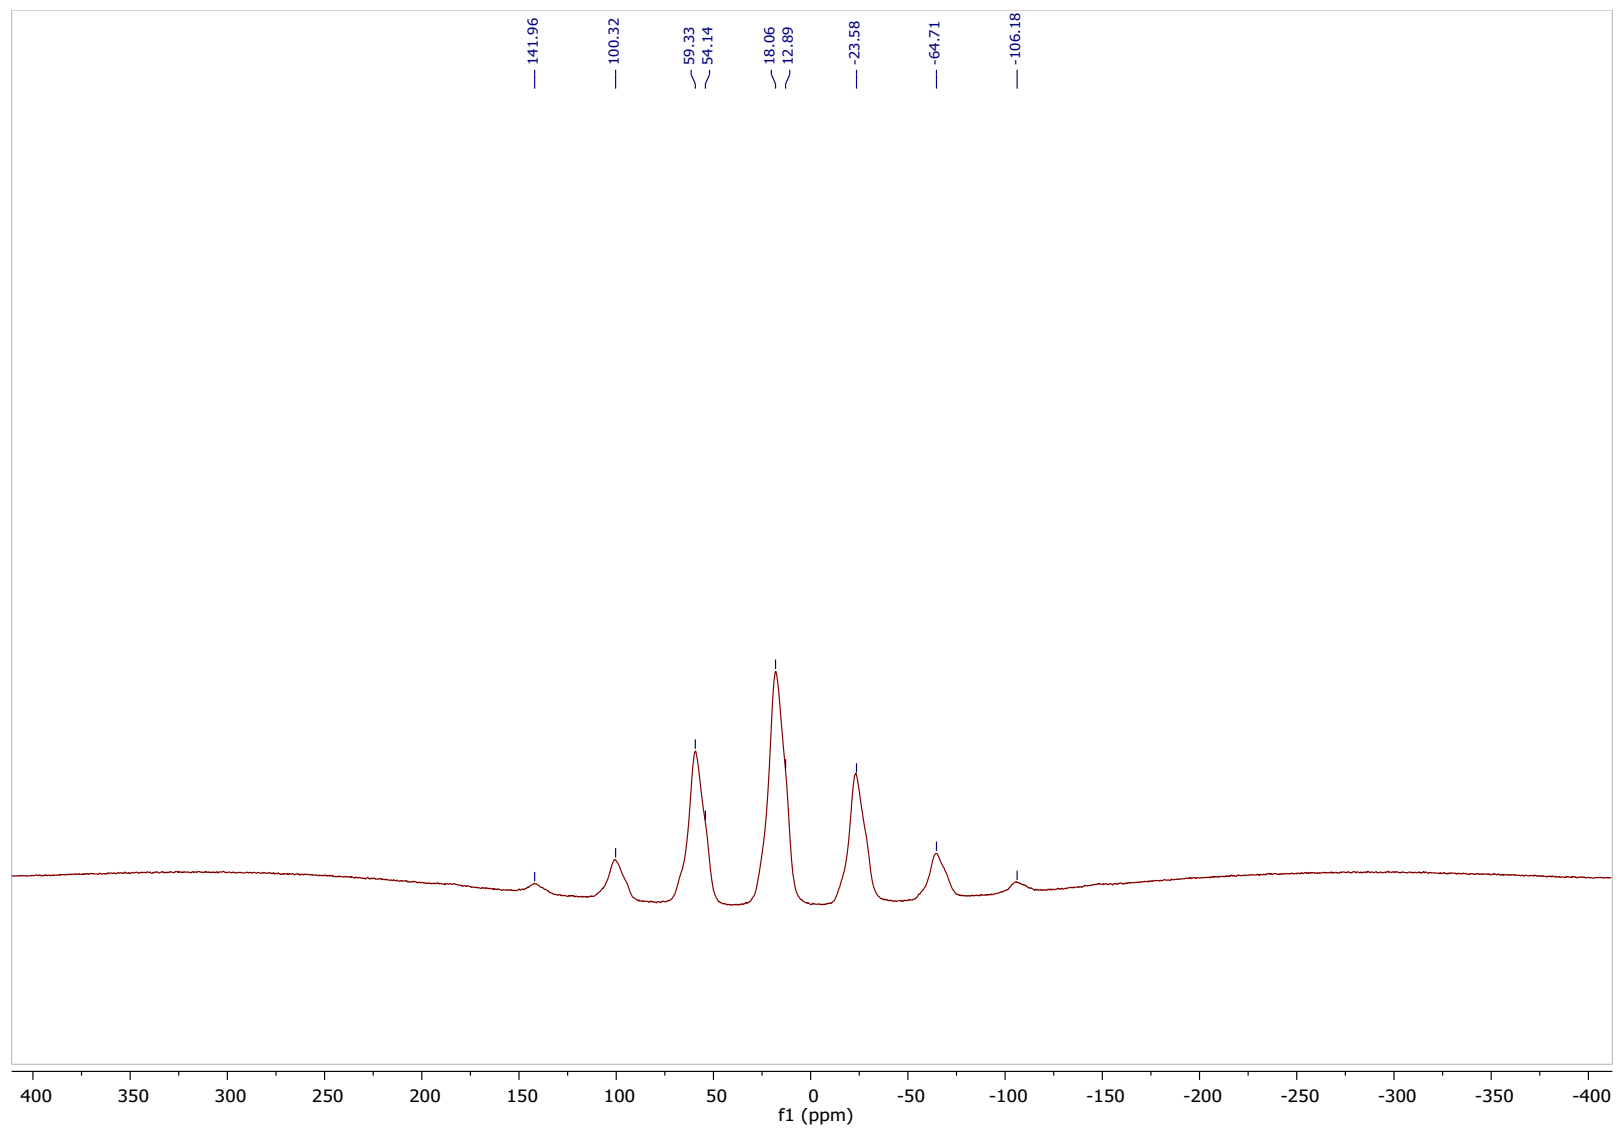

**Figure S4** Solid state  $^{31}\text{P}$  NMR spectrum of complex  $[\text{Bi}(\text{o-MeOPh})_2(\text{O}(\text{O})\text{PPh}_2)]_n$  **2**.

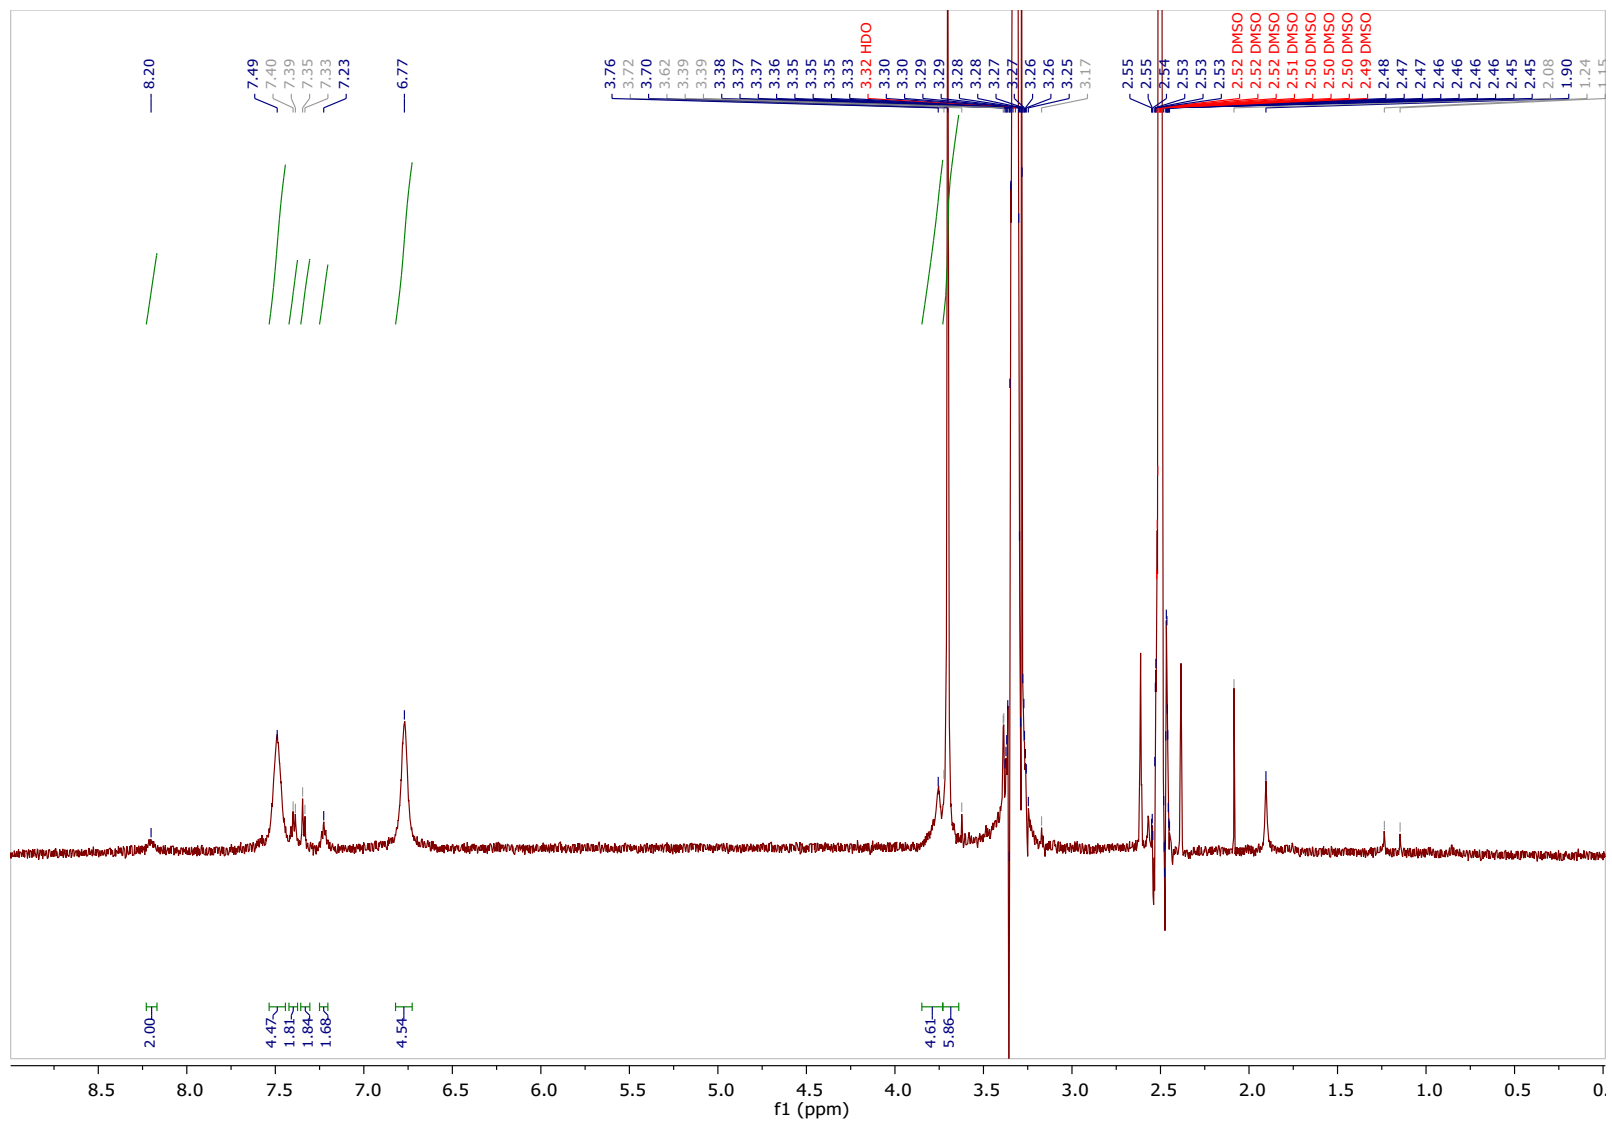

Figure S5  $^1\text{H}$  NMR spectrum of complex  $[\text{Bi}(\text{o-MeOPh})_2(\text{O}(\text{O})\text{P}(\text{p-MeOPh})_2)]_n$  **3** in  $\text{d}_6\text{-DMSO}$ .

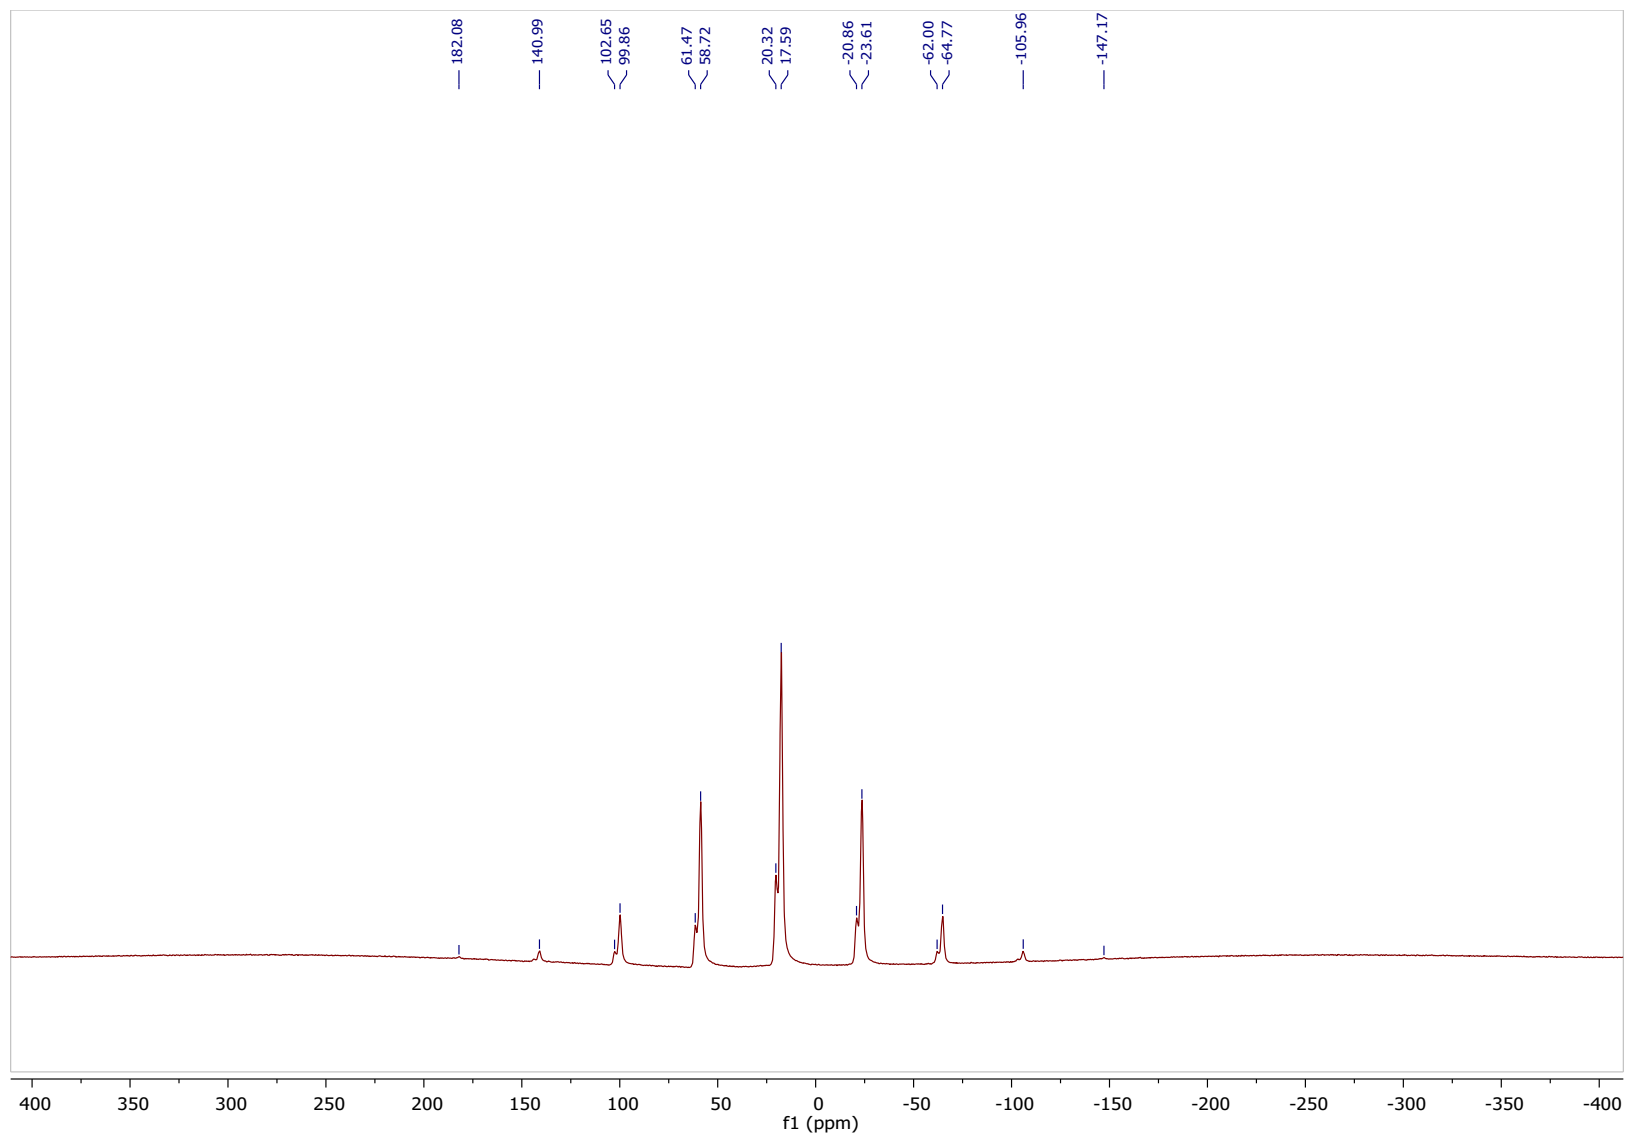

**Figure S6** Solid state  $^{31}\text{P}$  NMR spectrum of complex  $[\text{Bi}(\text{o-MeOPh})_2(\text{O}(\text{O})\text{P}(\text{p-MeOPh})_2)]_n$  **3**.



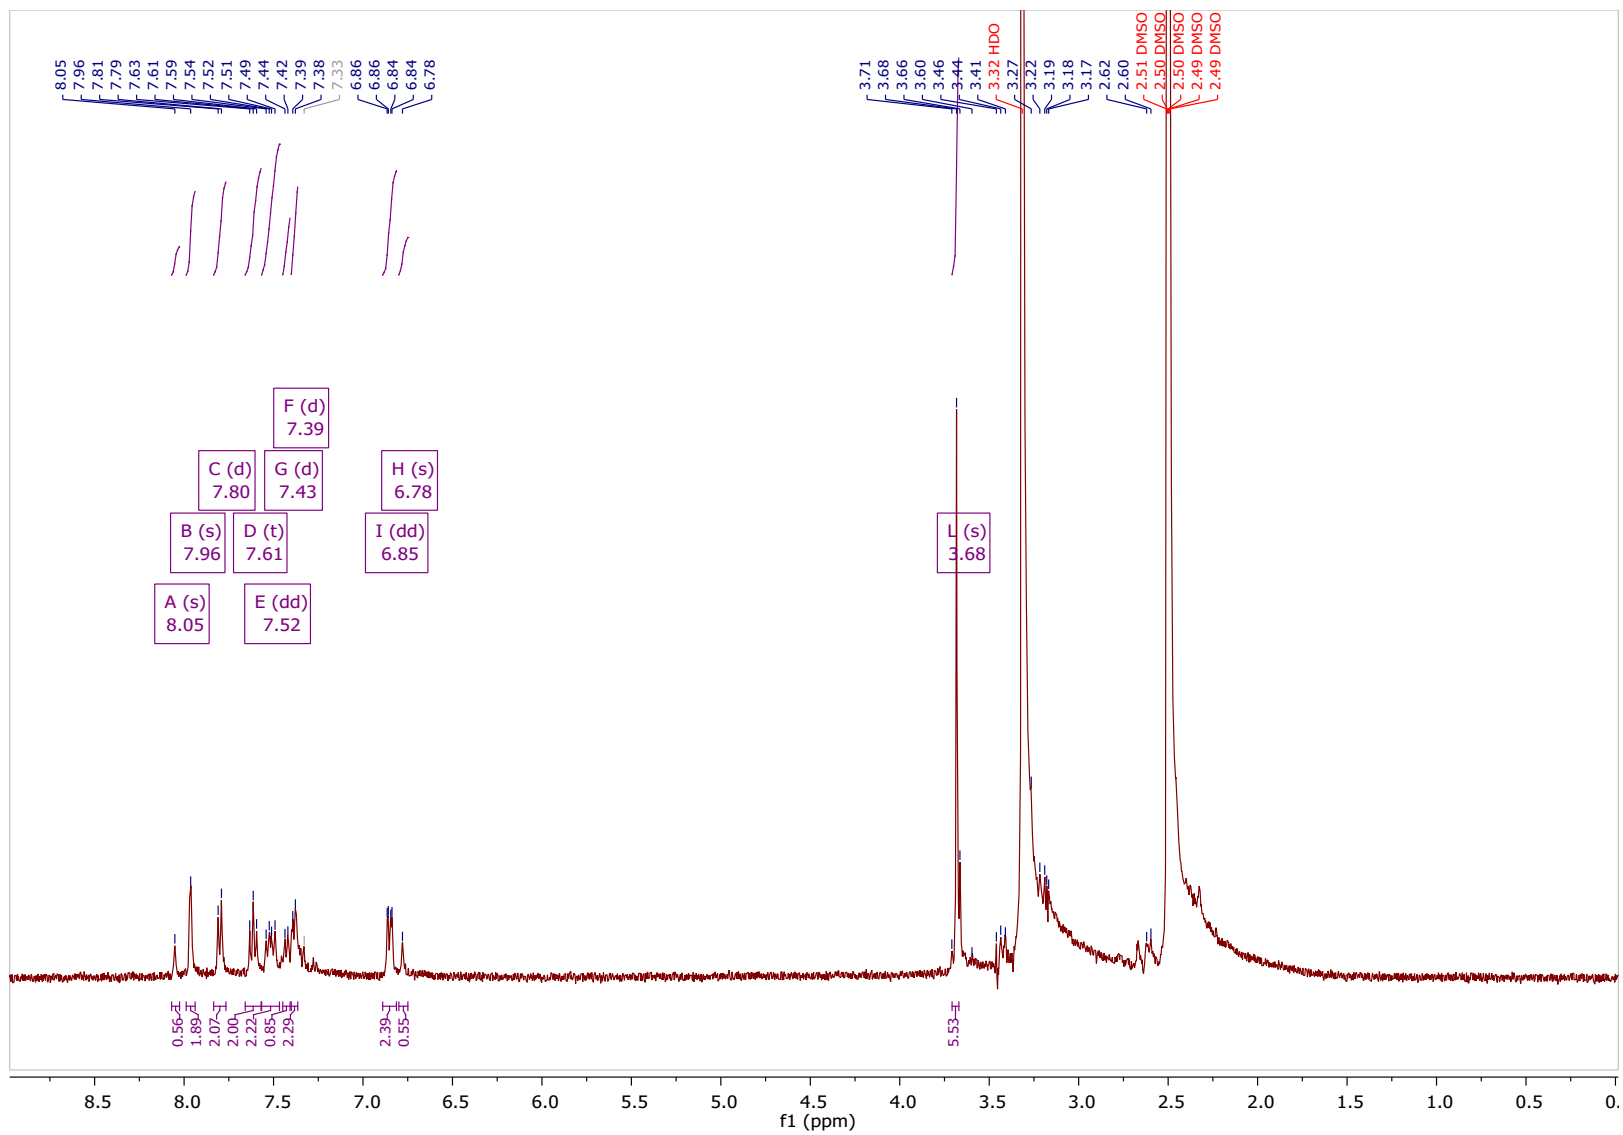

**Figure S7** <sup>1</sup>H NMR spectrum of complex  $[\text{Bi}(\text{m-MeOPh})_2(\text{O}(\text{O})\text{P}(\text{H})\text{Ph})]_n$  **4** in d<sub>6</sub>-DMSO.

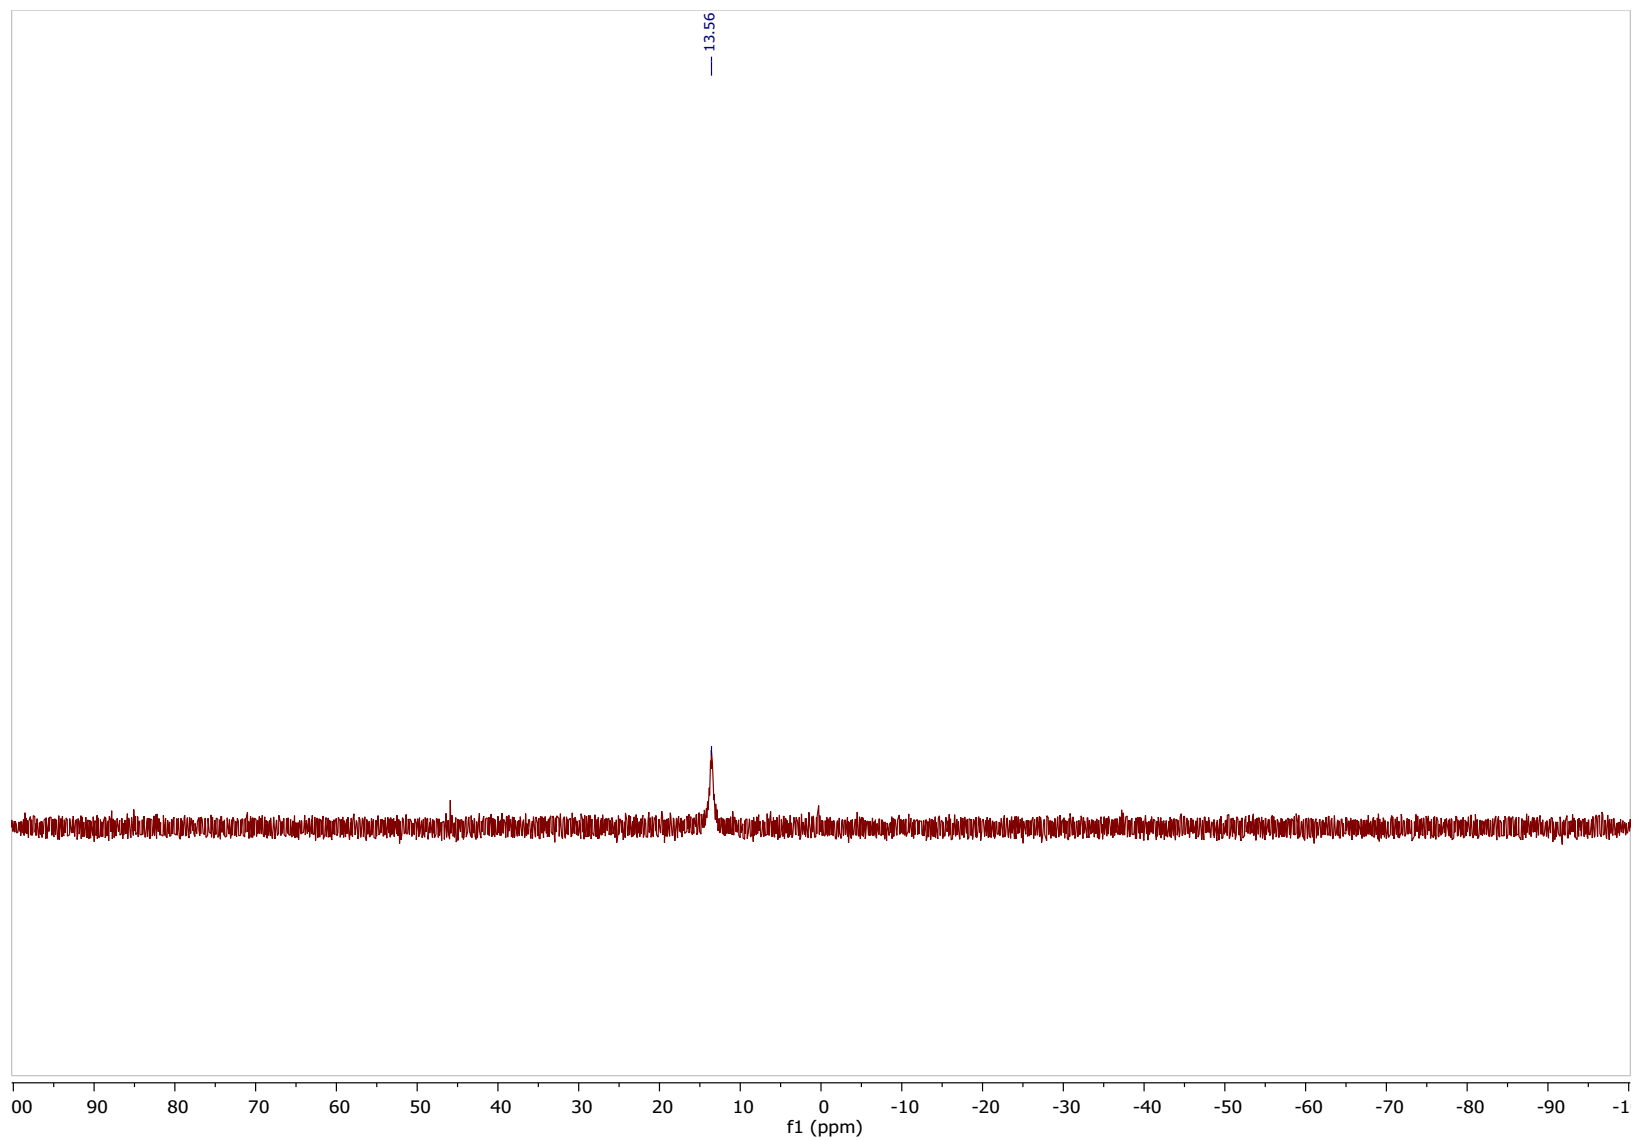

**Figure S8**  $^{31}\text{P}$  NMR spectrum of complex  $[\text{Bi}(m\text{-MeOPh})_2(\text{O}(\text{O})\text{P}(\text{H})\text{Ph})]_n$  **4** in  $d_6$ -DMSO.

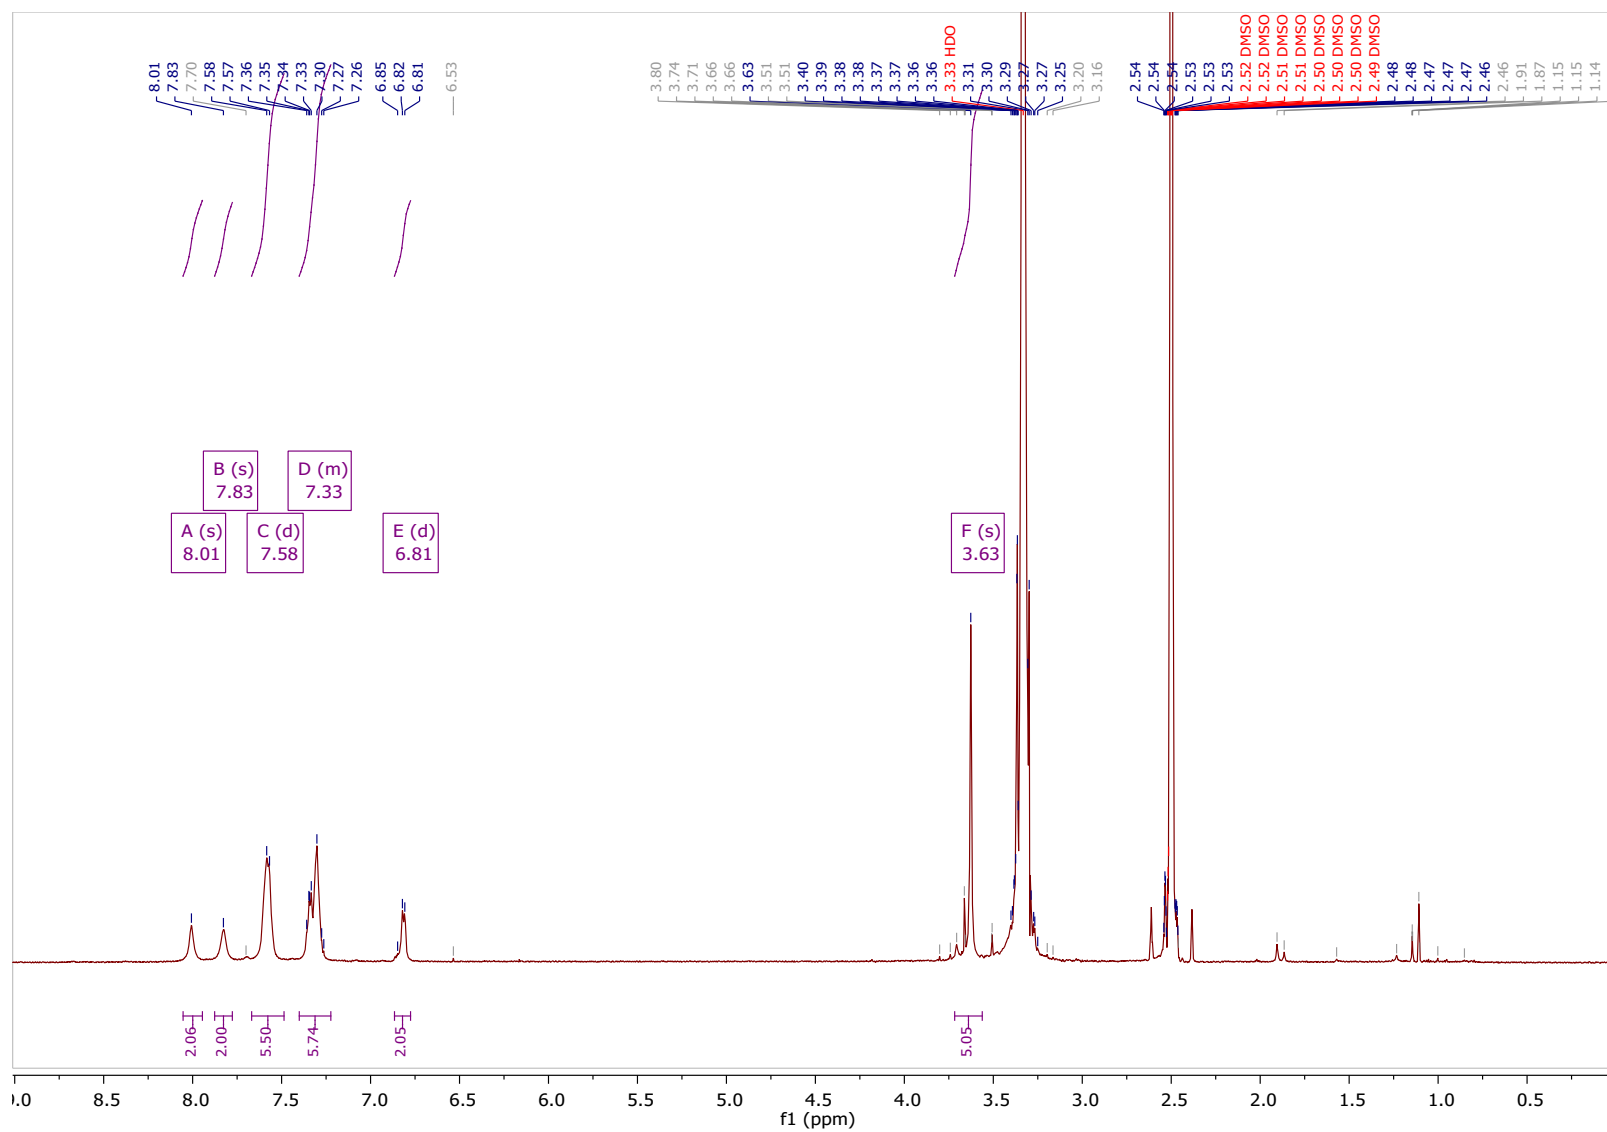

**Figure S9** <sup>1</sup>H NMR spectrum of complex  $[\text{Bi}(m\text{-MeOPh})_2(\text{O}(\text{O})\text{PPh}_2)]_n$  **5** in d<sub>6</sub>-DMSO.

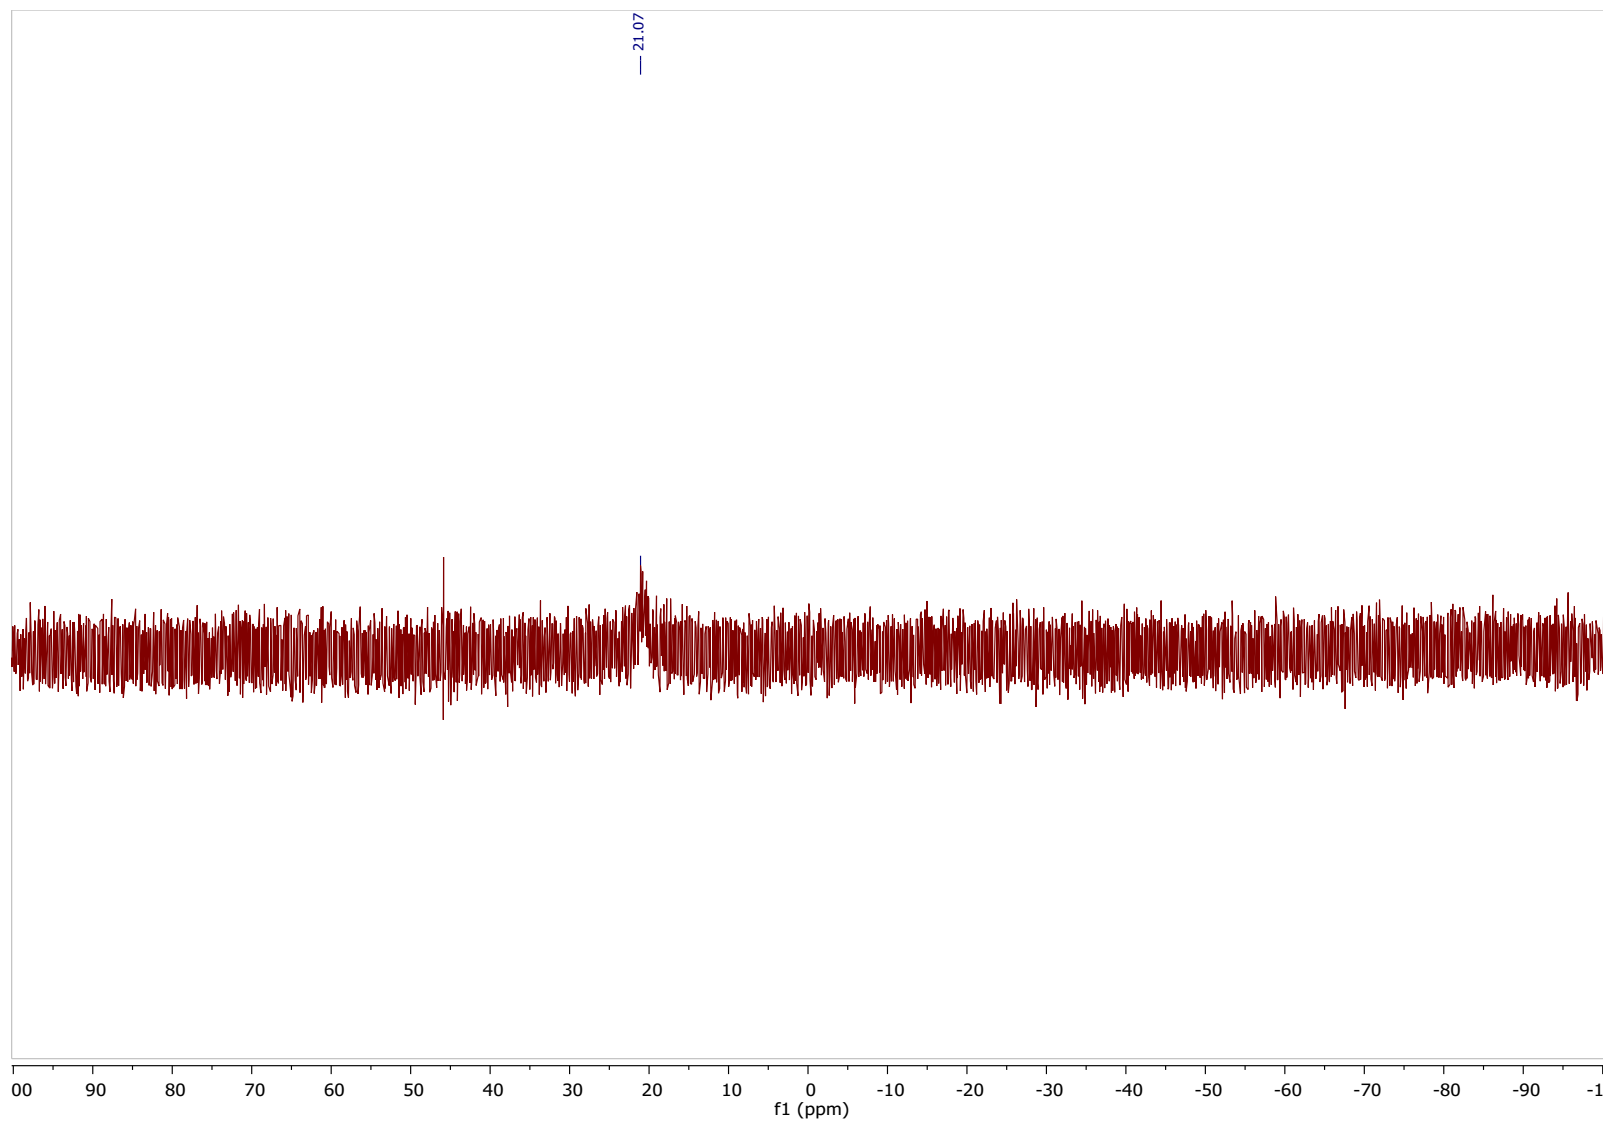

**Figure S10**  $^{31}\text{P}$  NMR spectrum of complex  $[\text{Bi}(m\text{-MeOPh})_2(\text{O}(\text{O})\text{PPh}_2)]_n$  **5** in  $\text{d}_6\text{-DMSO}$ .

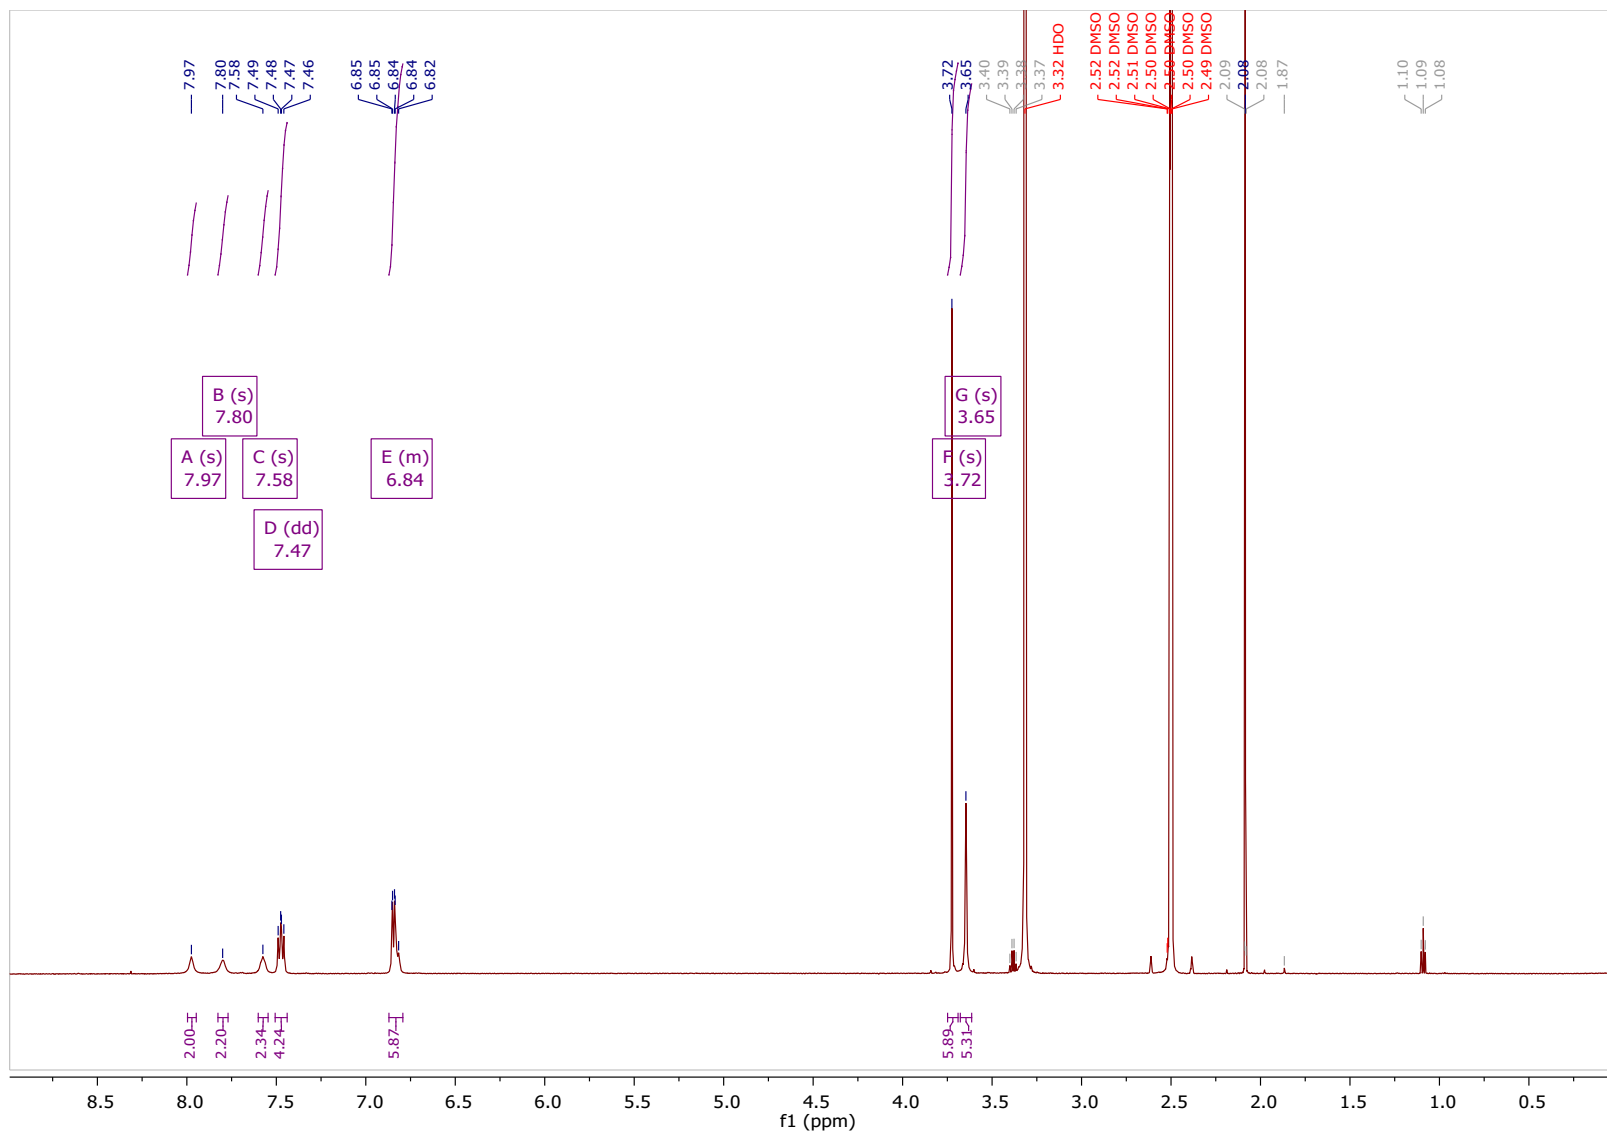

**Figure S11** <sup>1</sup>H NMR spectrum of complex  $[\text{Bi}(m\text{-MeOPh})_2(\text{O}(\text{O})\text{P}(p\text{-MeOPh})_2)]_n$  **6** in d<sub>6</sub>-DMSO. Traces of acetone and Et<sub>2</sub>O can be observed after washing.

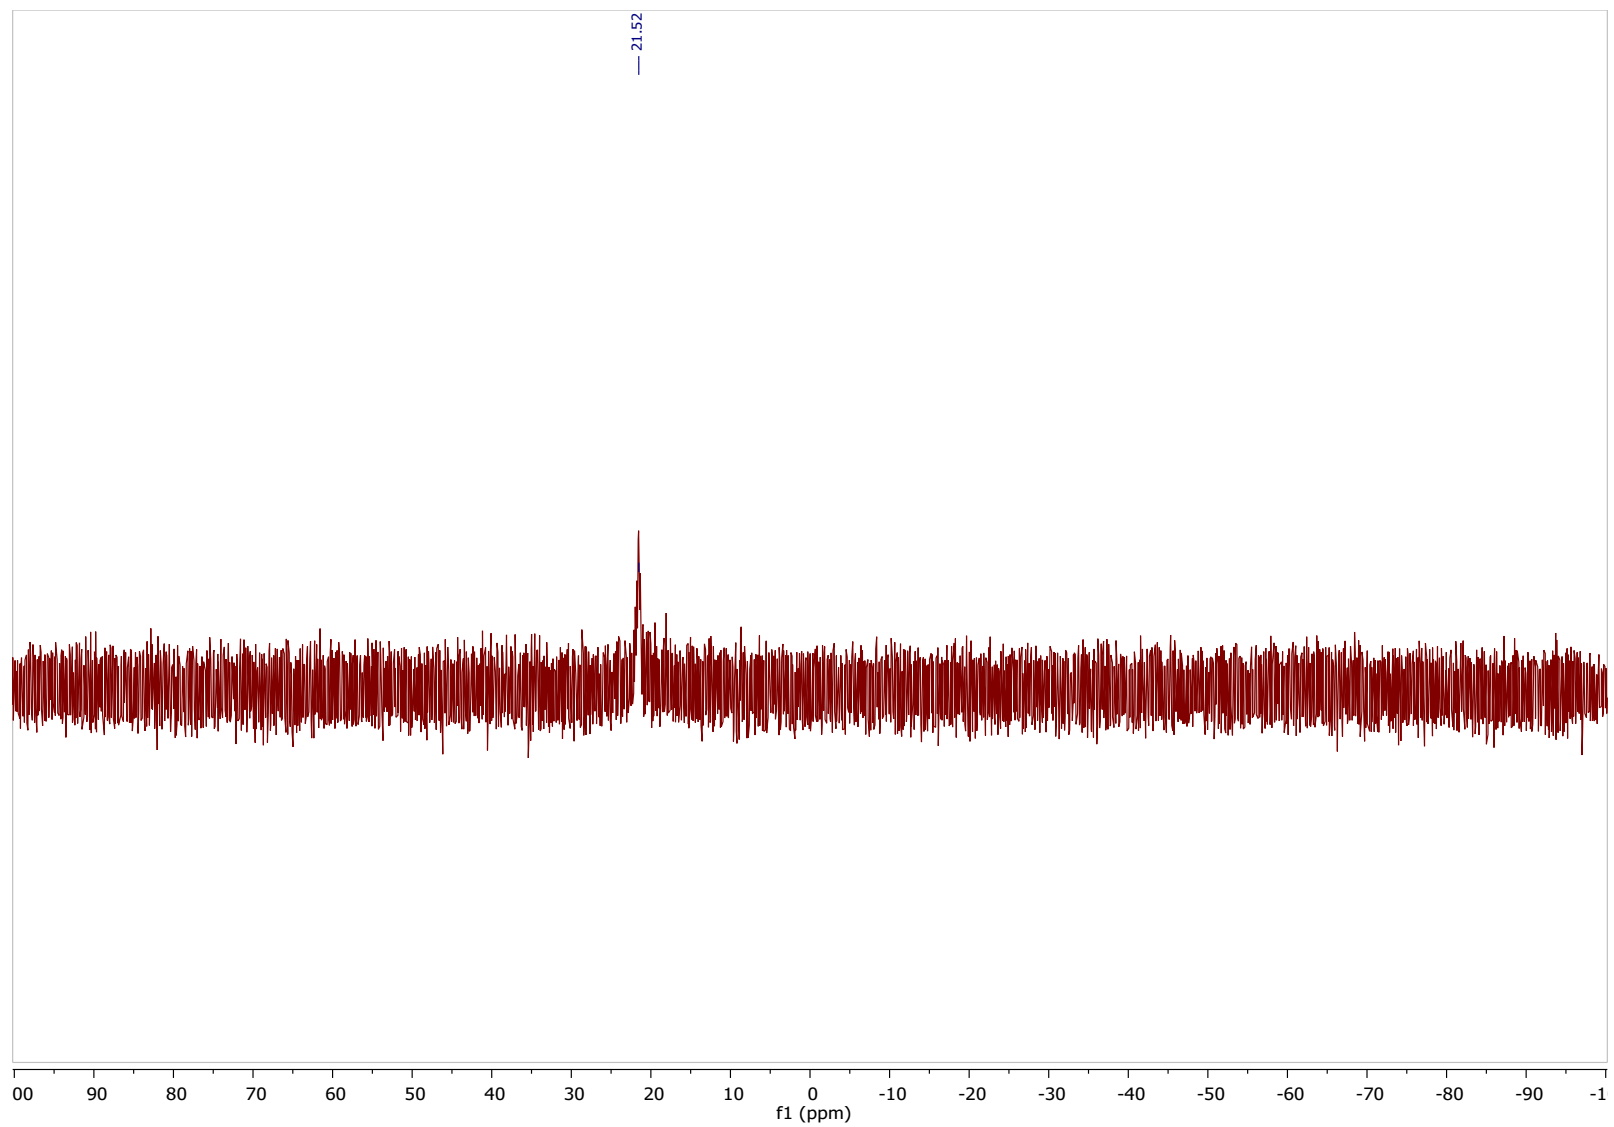

**Figure S12**  $^{31}\text{P}$  NMR spectrum of complex  $[\text{Bi}(m\text{-MeOPh})_2(\text{O}(\text{O})\text{P}(p\text{-MeOPh})_2)]_n$  **6** in  $d_6$ -DMSO.

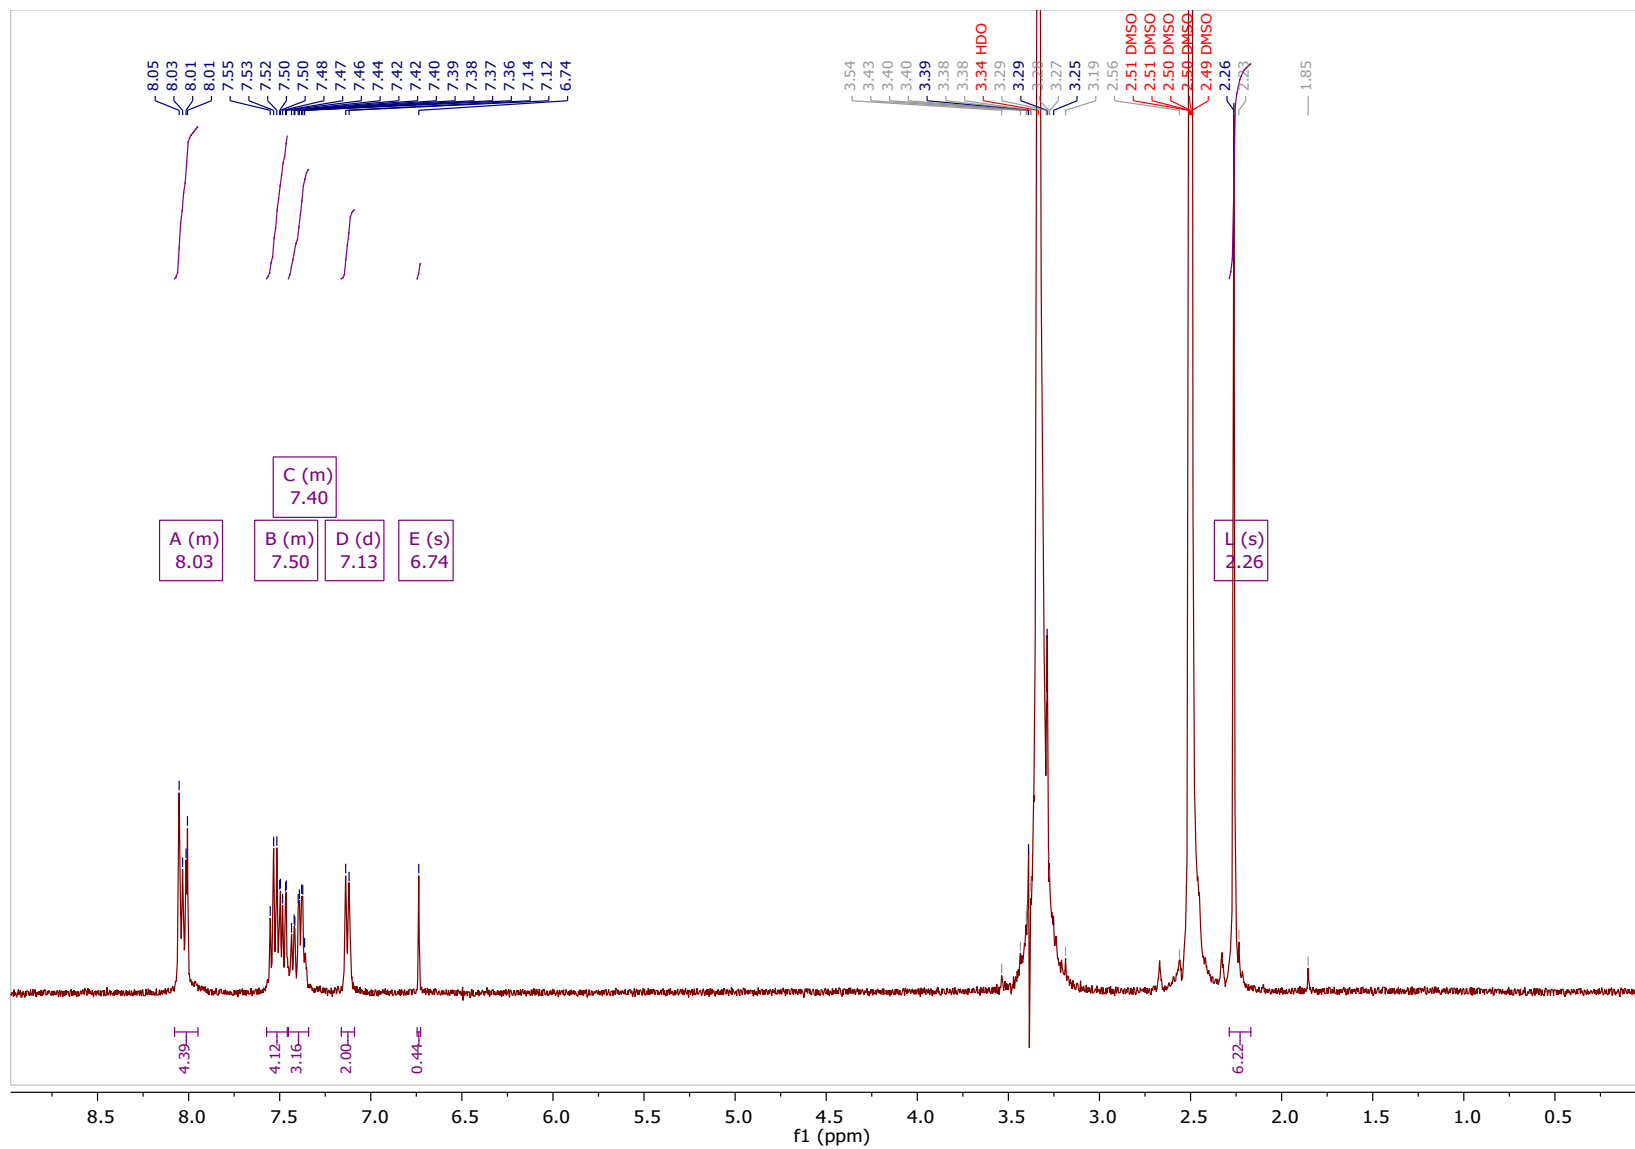

**Figure S13**  $^1\text{H}$  NMR spectrum of complex  $[\text{Bi}(m\text{-tol})_2(\text{O}(\text{O})\text{P}(\text{H})\text{Ph})]_n$  in  $d_6$ -DMSO.

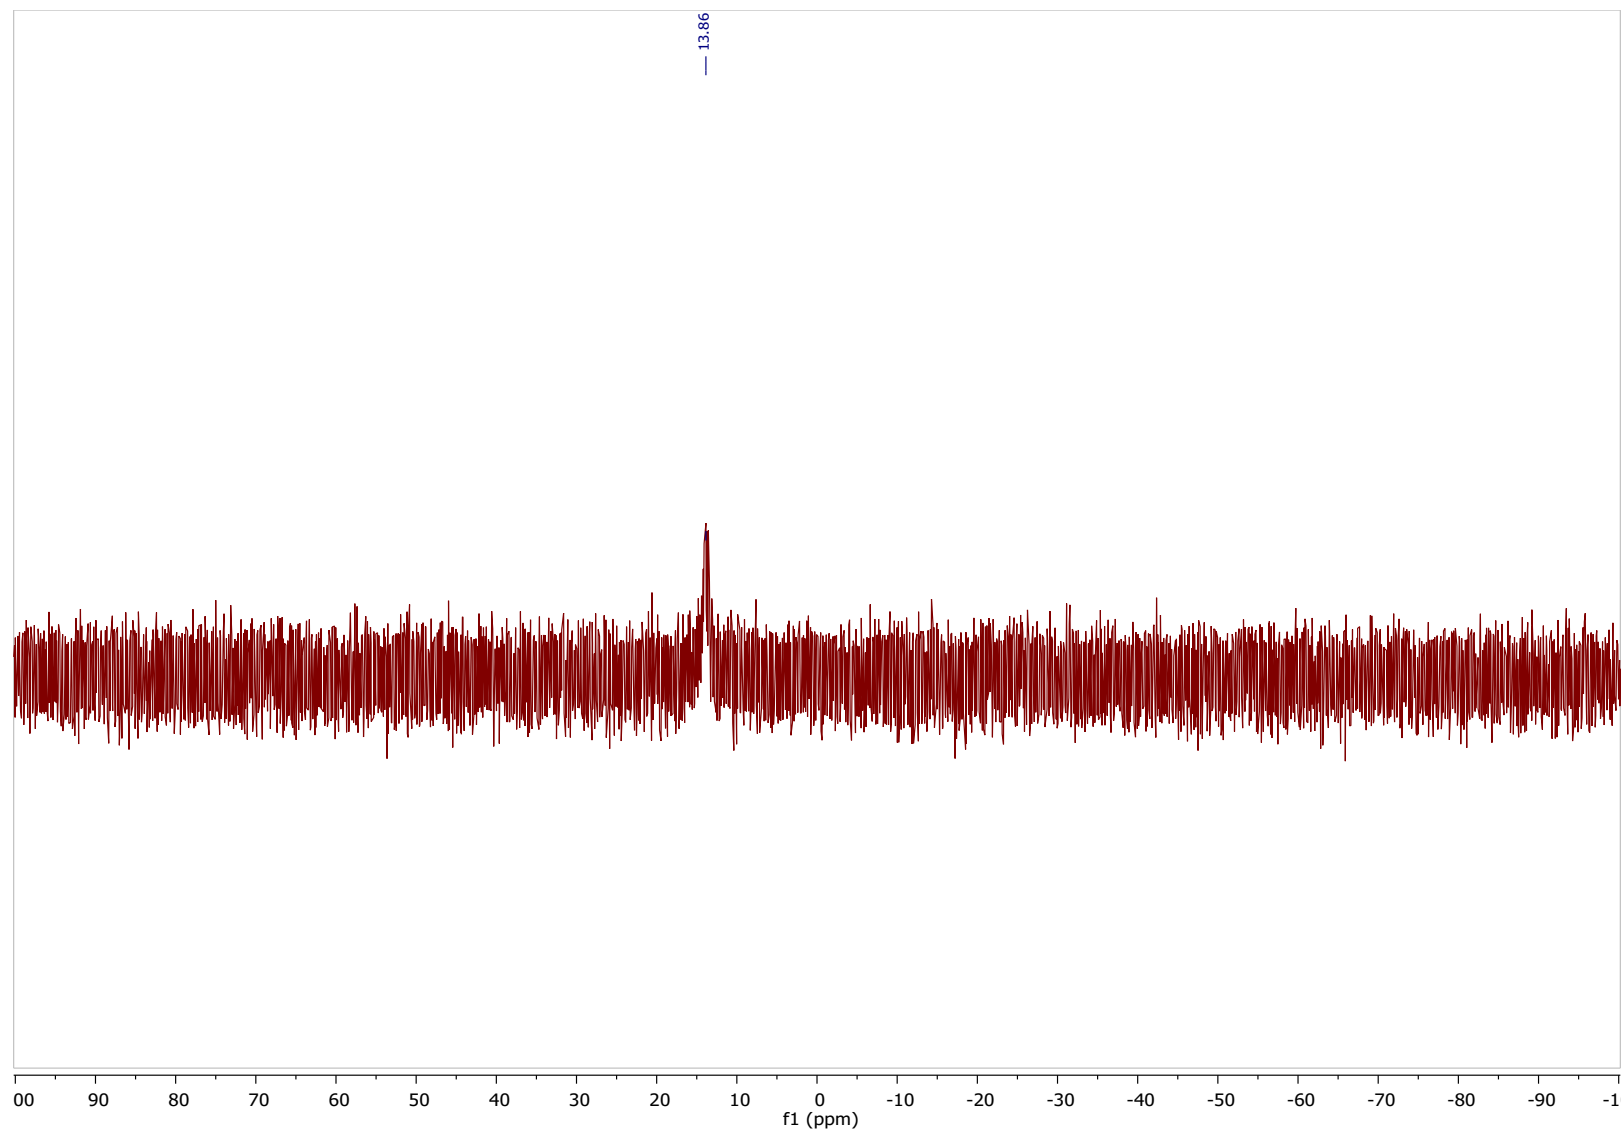

**Figure S14**  $^{31}\text{P}$  NMR spectrum of complex  $[\text{Bi}(m\text{-tol})_2(\text{O}(\text{O})\text{P}(\text{H})\text{Ph})]_n$  **7** in  $\text{d}_6\text{-DMSO}$ .



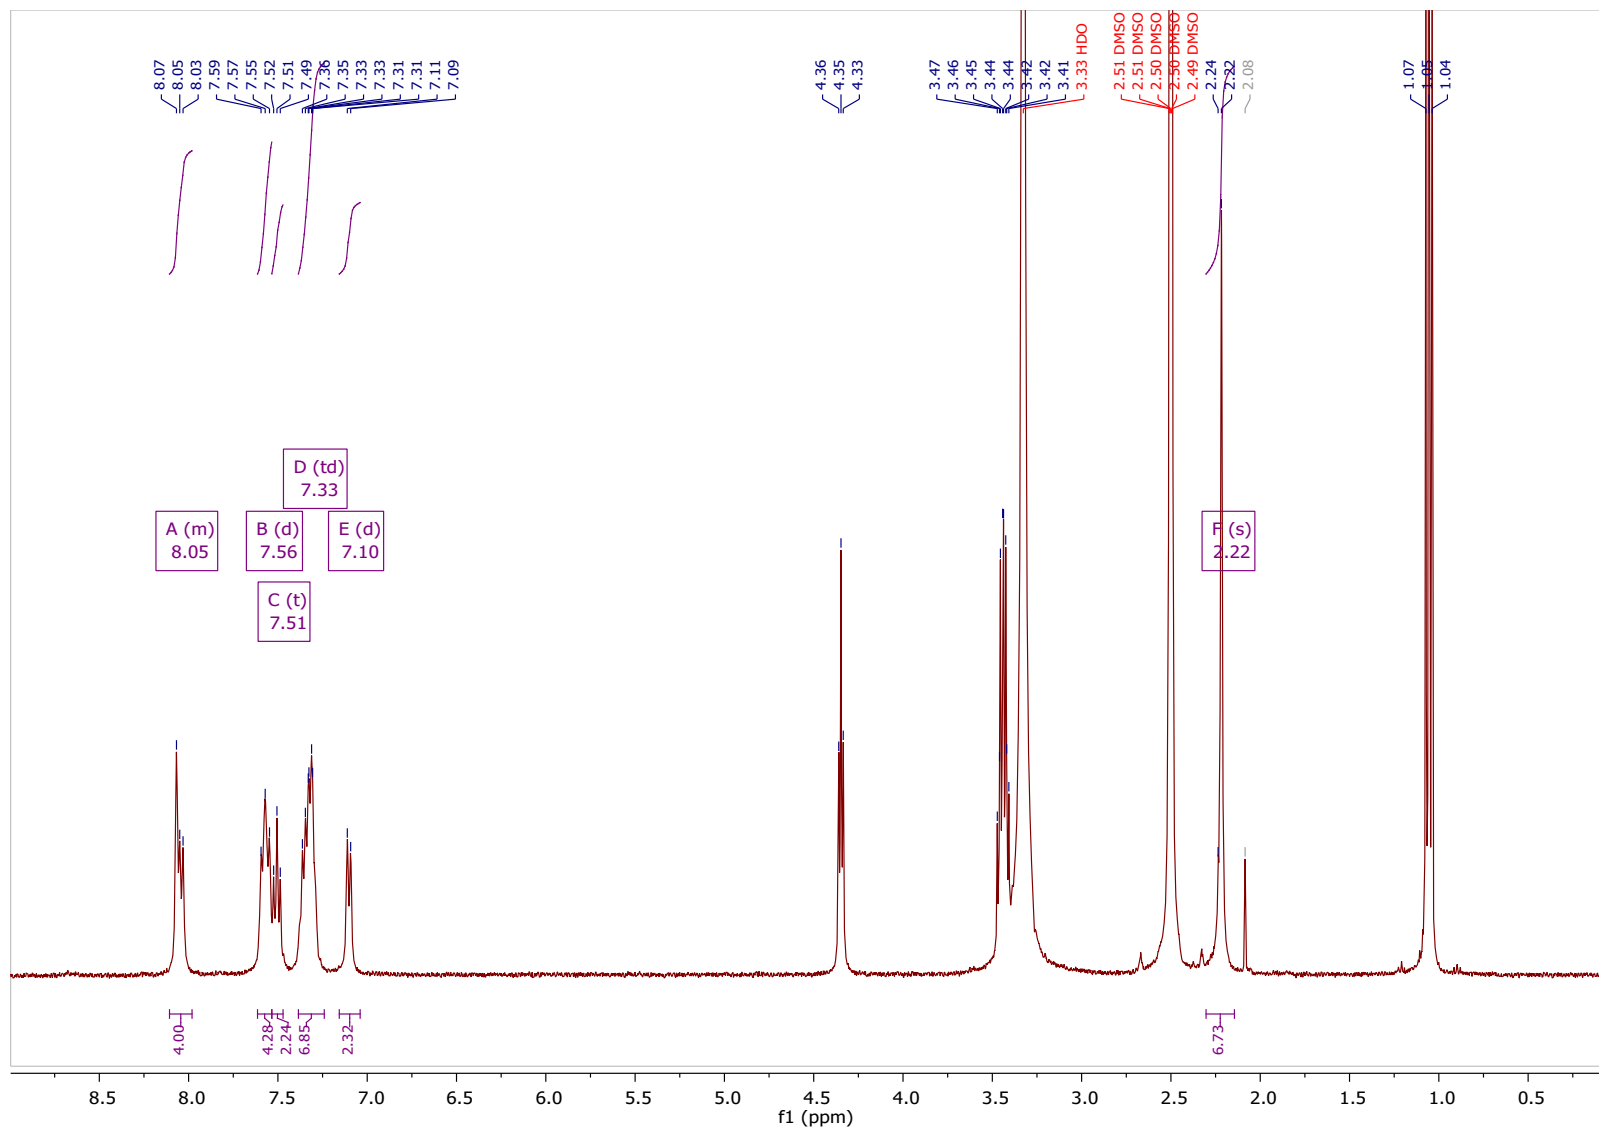

**Figure S15** <sup>1</sup>H NMR spectrum of complex ([Bi(*m*-tol)<sub>2</sub>(O(O)PPh<sub>2</sub>)]·DMSO)<sub>n</sub> **8** in d<sub>6</sub>-DMSO. Traces of acetone and ethanol can be observed after washing.

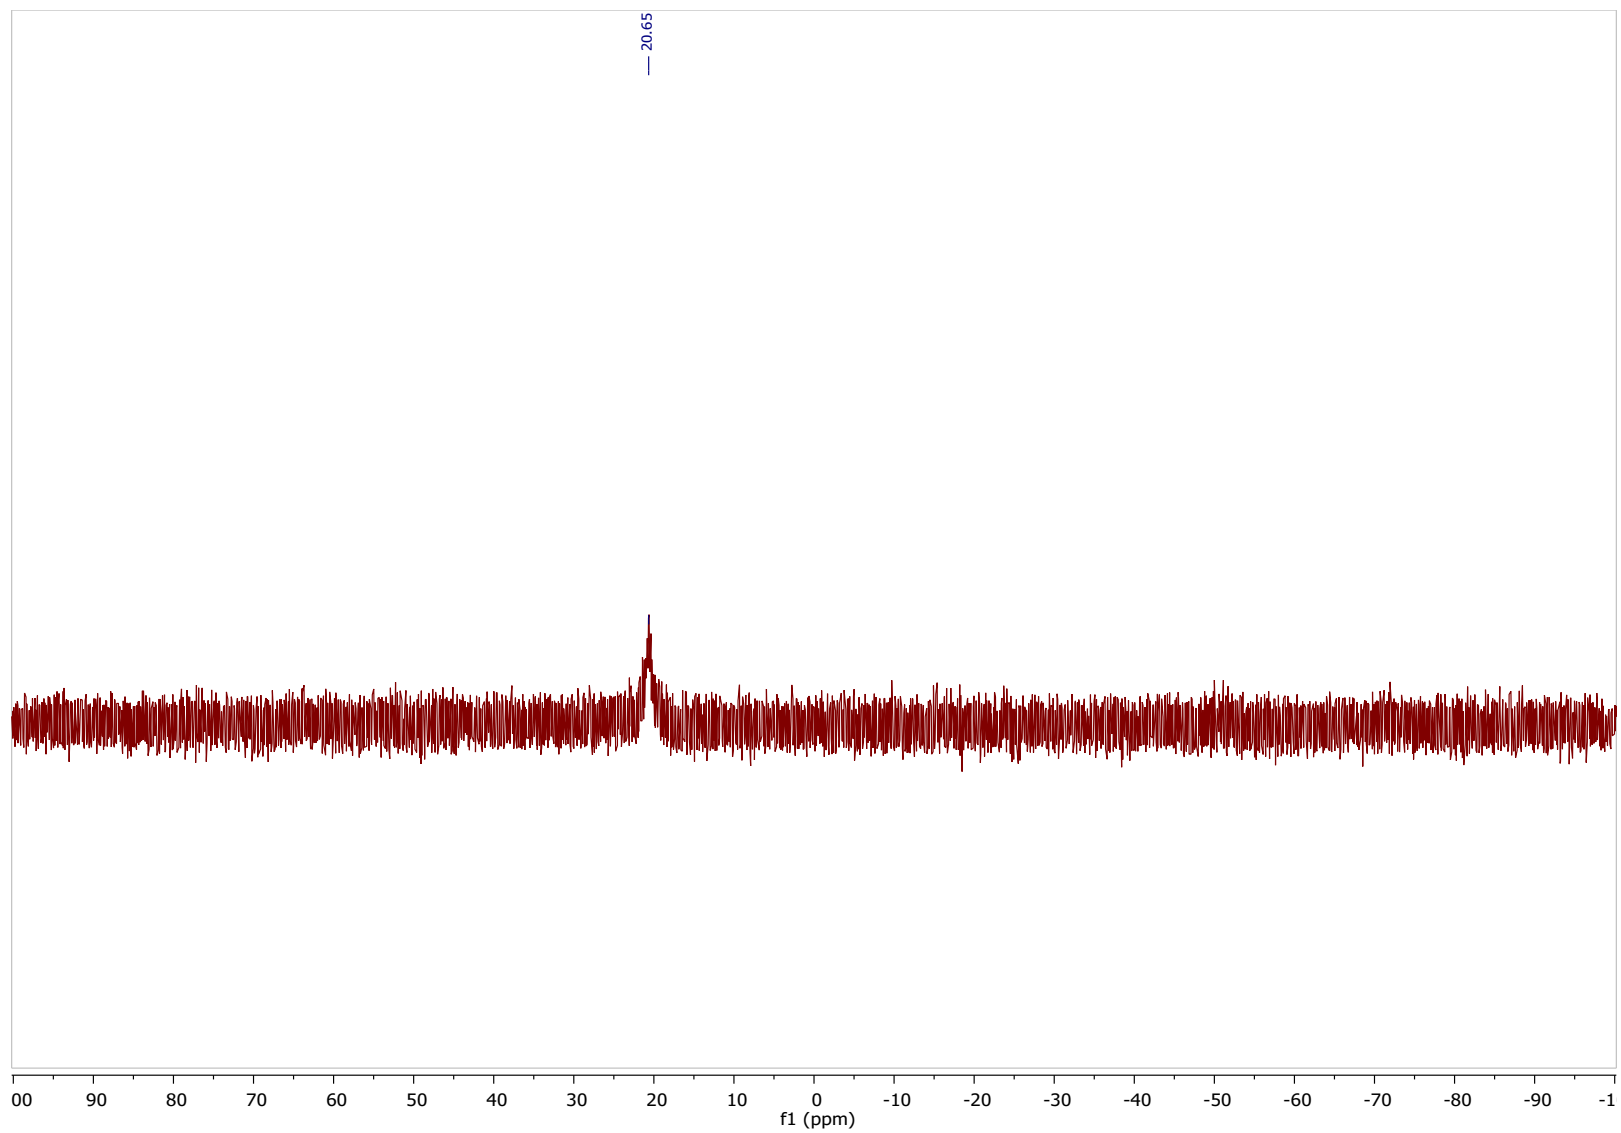

**Figure S16**  $^{31}\text{P}$  NMR spectrum of complex  $[\text{Bi}(m\text{-tol})_2(\text{O}(\text{O})\text{PPh}_2)]_n$  **8** in  $d_6$ -DMSO.

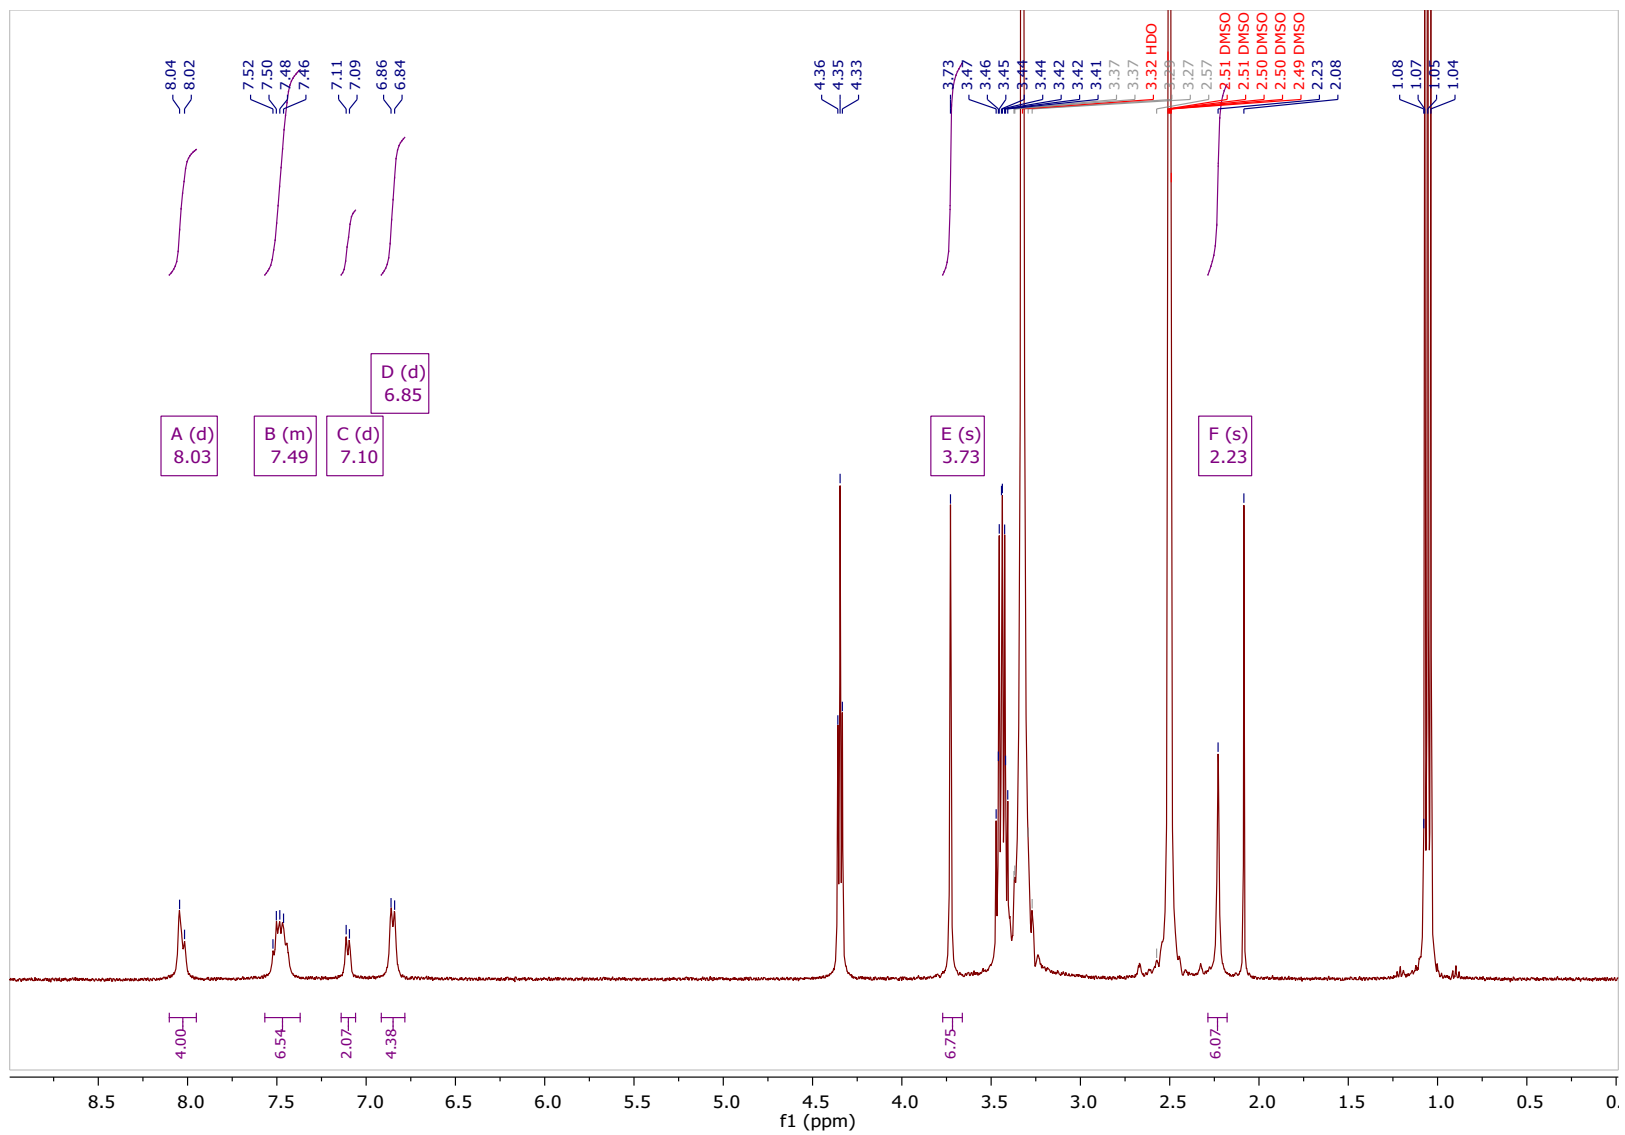

**Figure S17**  $^3\text{H}$  NMR spectrum of complex  $[\text{Bi}(\text{m-tol})_2(\text{O}(\text{O})\text{P}(\text{p-MeOPh})_2)]_n$  **9** in  $\text{d}_6\text{-DMSO}$ . Traces of acetone and ethanol can be observed after washing.

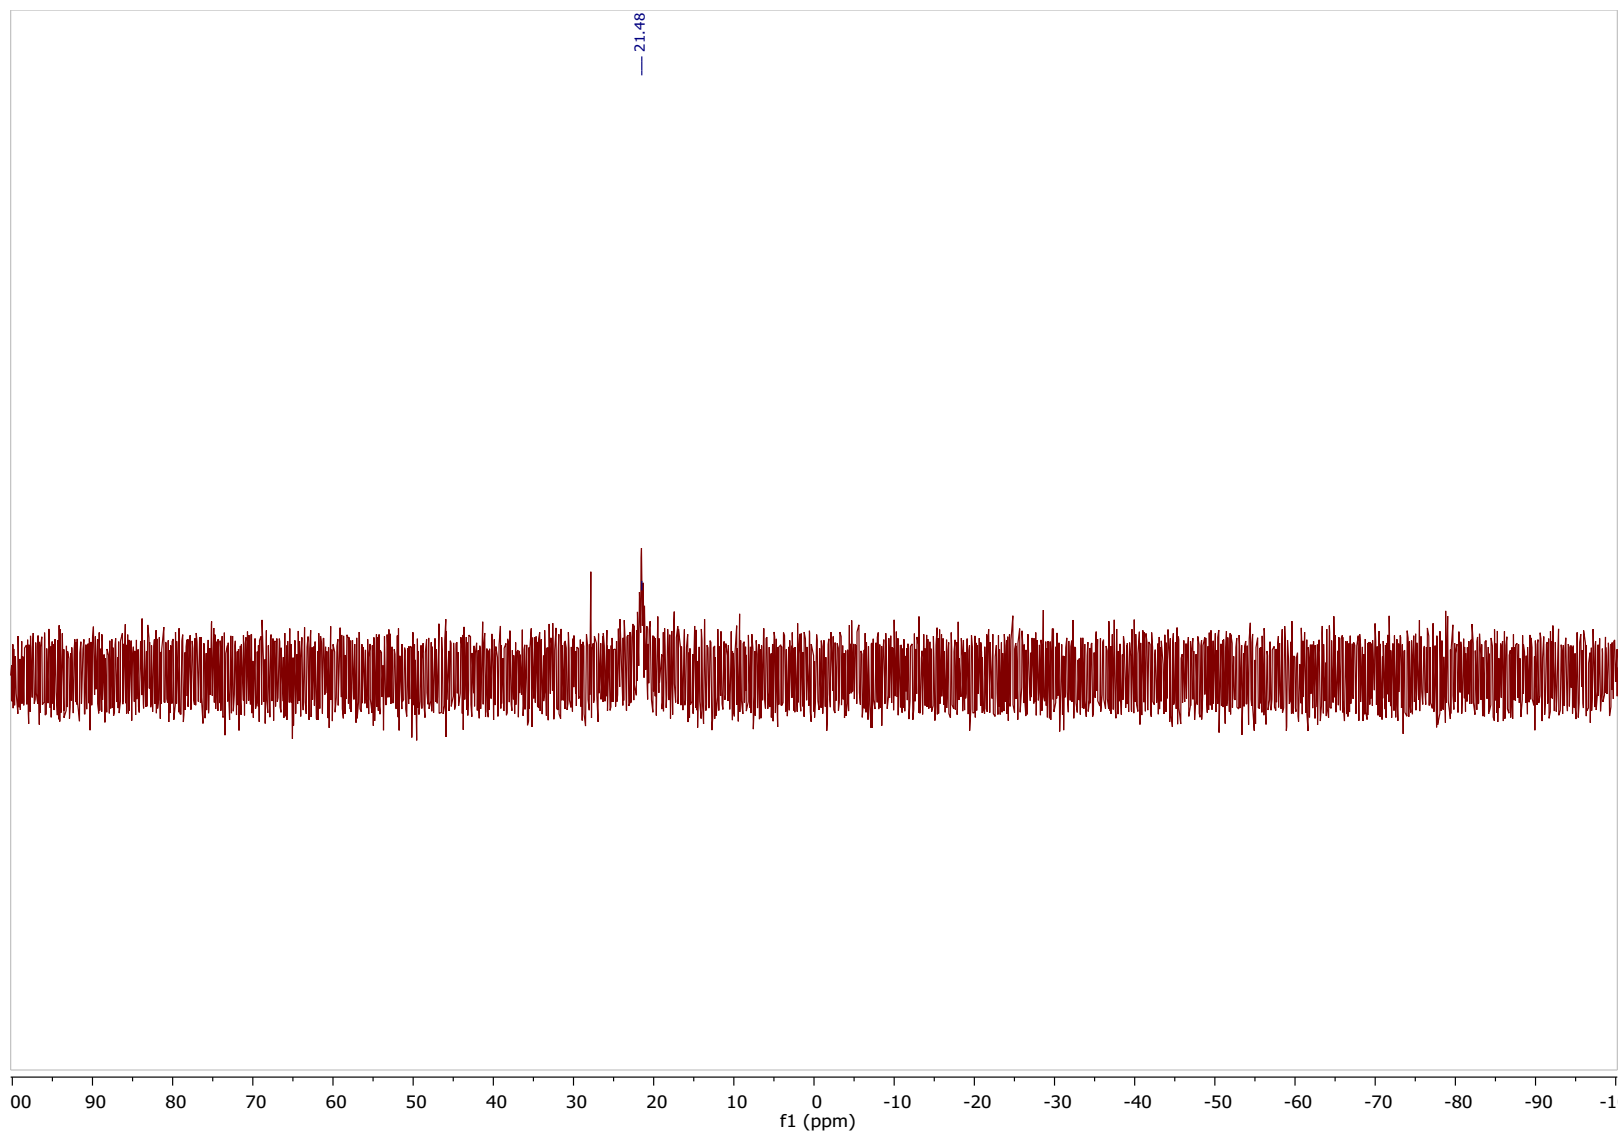

**Figure S18**  $^{31}\text{P}$  NMR spectrum of complex  $[\text{Bi}(m\text{-tol})_2(\text{O}(\text{O})\text{P}(p\text{-MeOPh})_2)]_n$  **9** in  $d_6$ -DMSO.

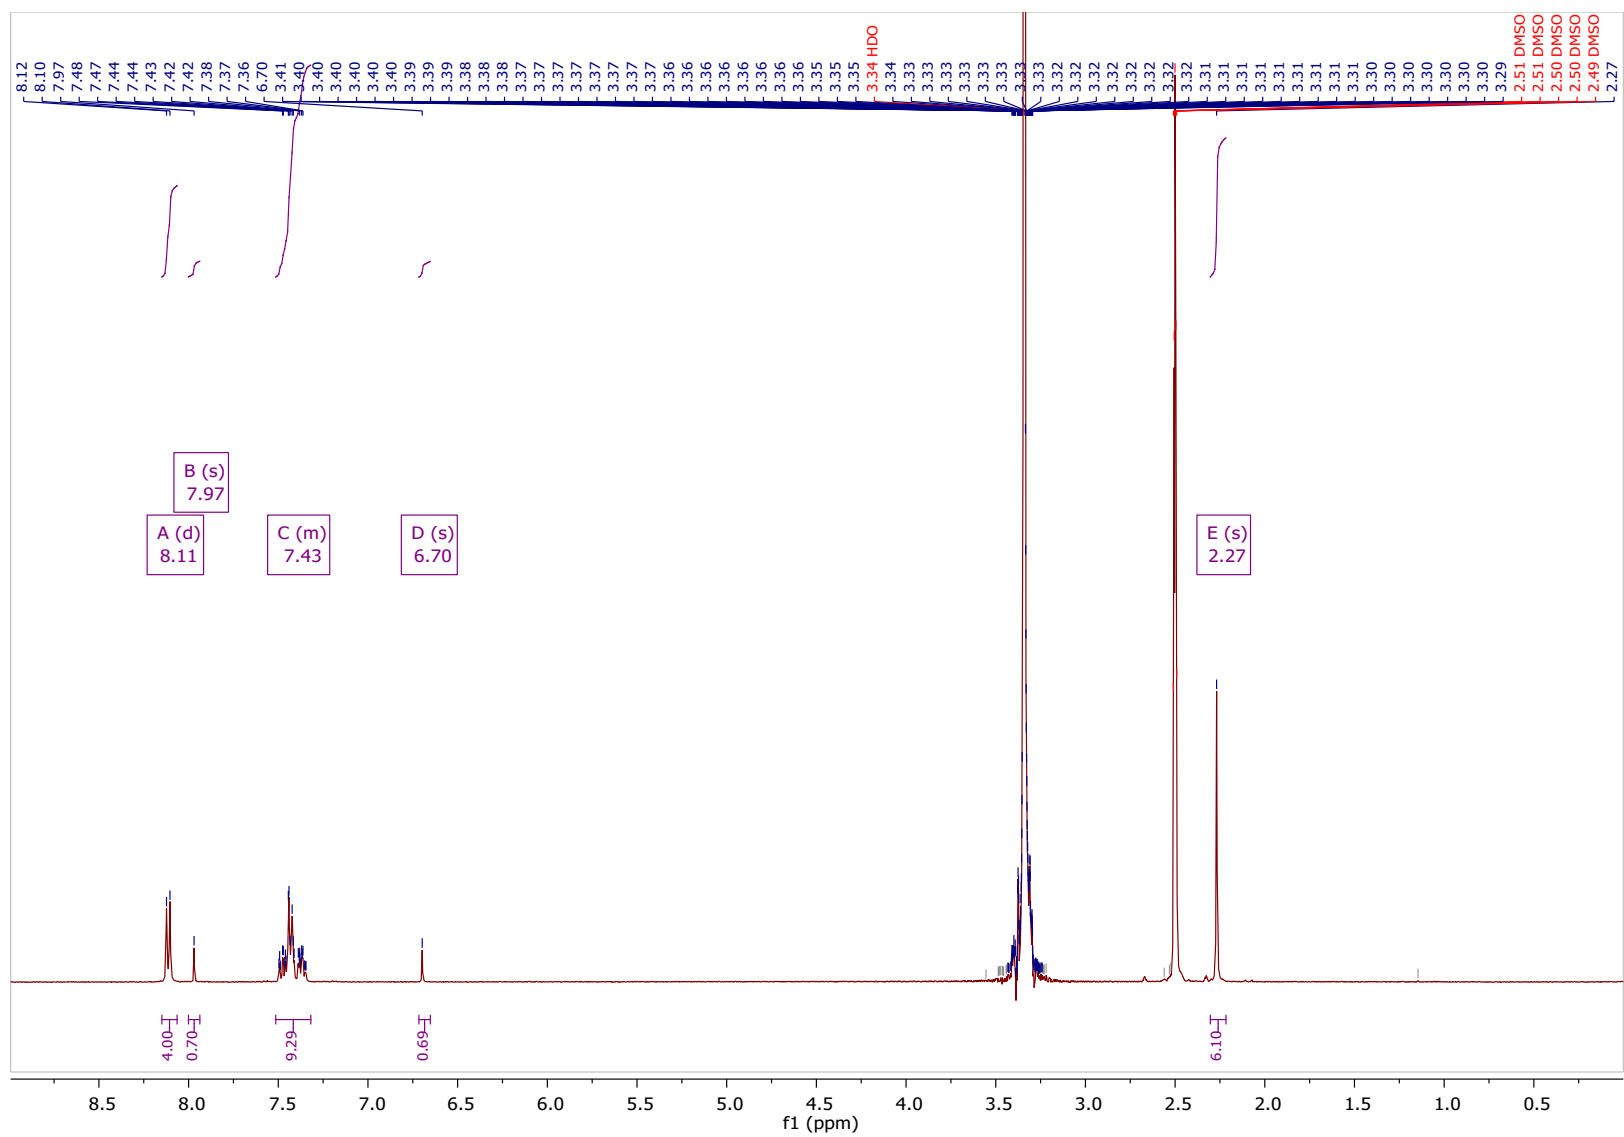

**Figure S19** <sup>1</sup>H NMR spectrum of complex  $[\text{Bi}(\text{p-tol})_2(\text{O}(\text{O})\text{P}(\text{H})\text{Ph})]_n$  **10** in d<sub>6</sub>-DMSO.

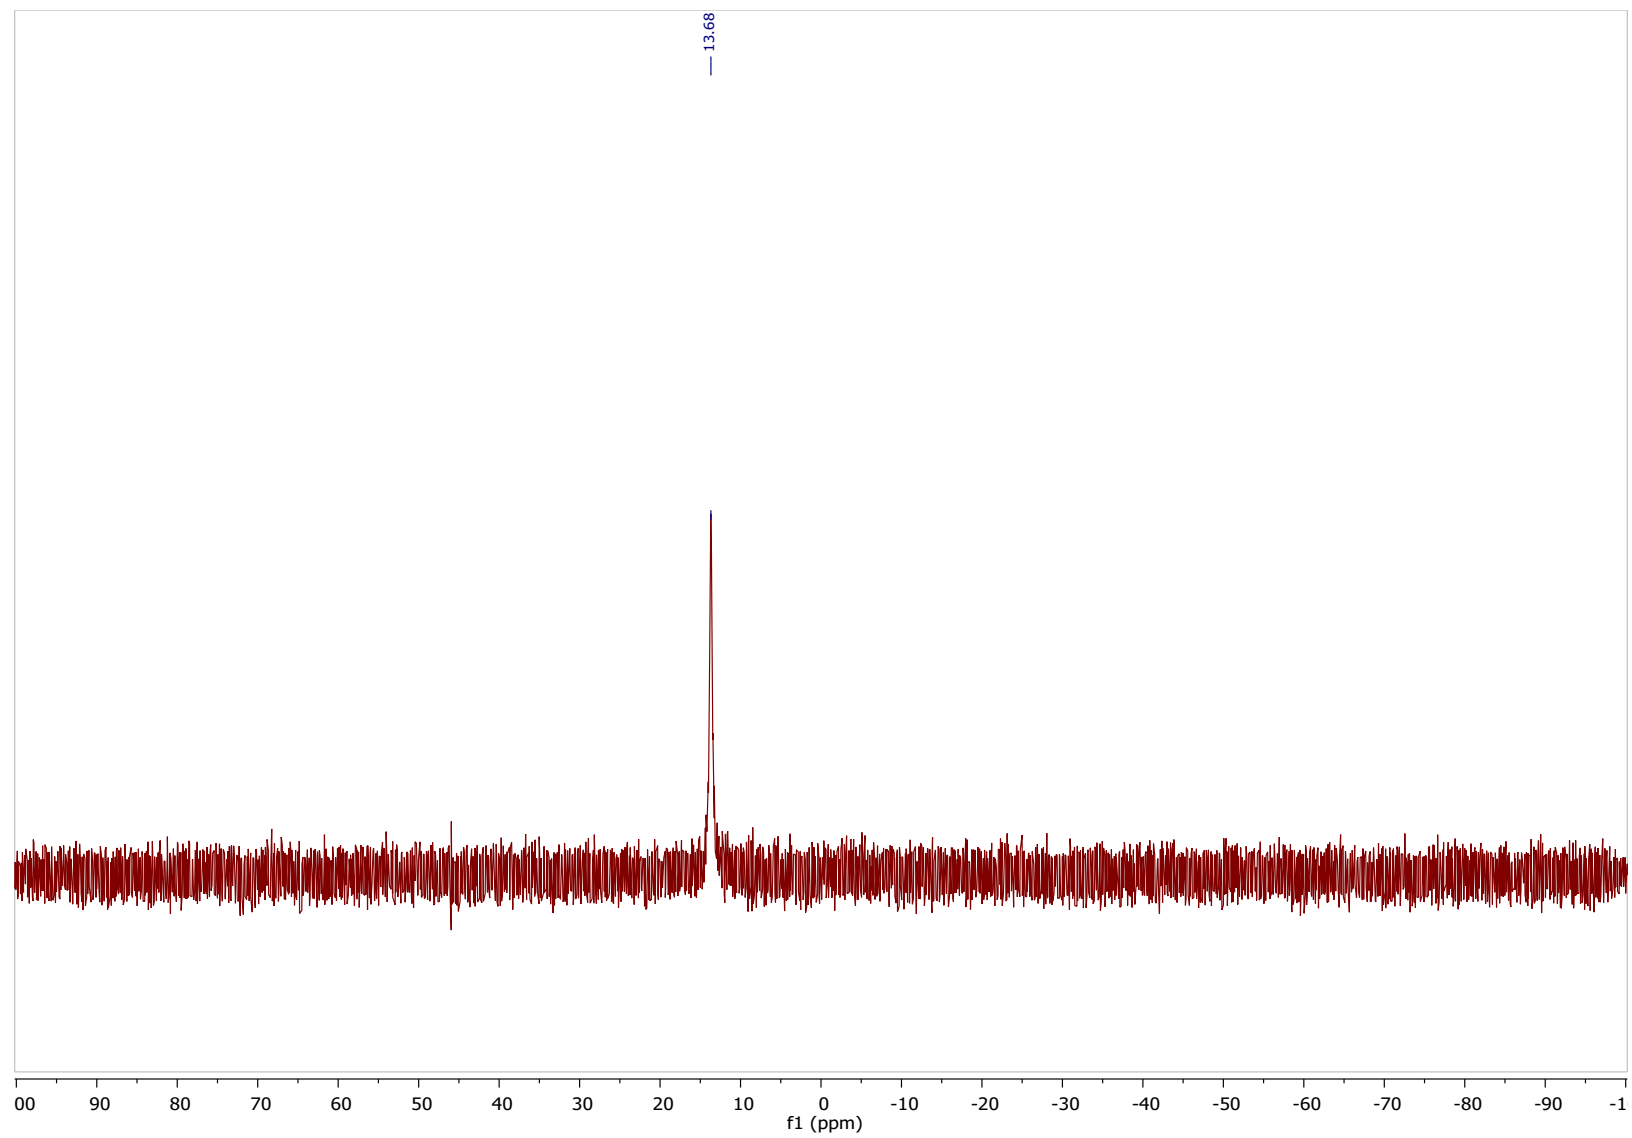

**Figure S20**  $^{31}\text{P}$  NMR spectrum of complex  $[\text{Bi}(p\text{-tol})_2(\text{O}(\text{O})\text{P}(\text{H})\text{Ph})]_n$  **10** in  $d_6$ -DMSO.

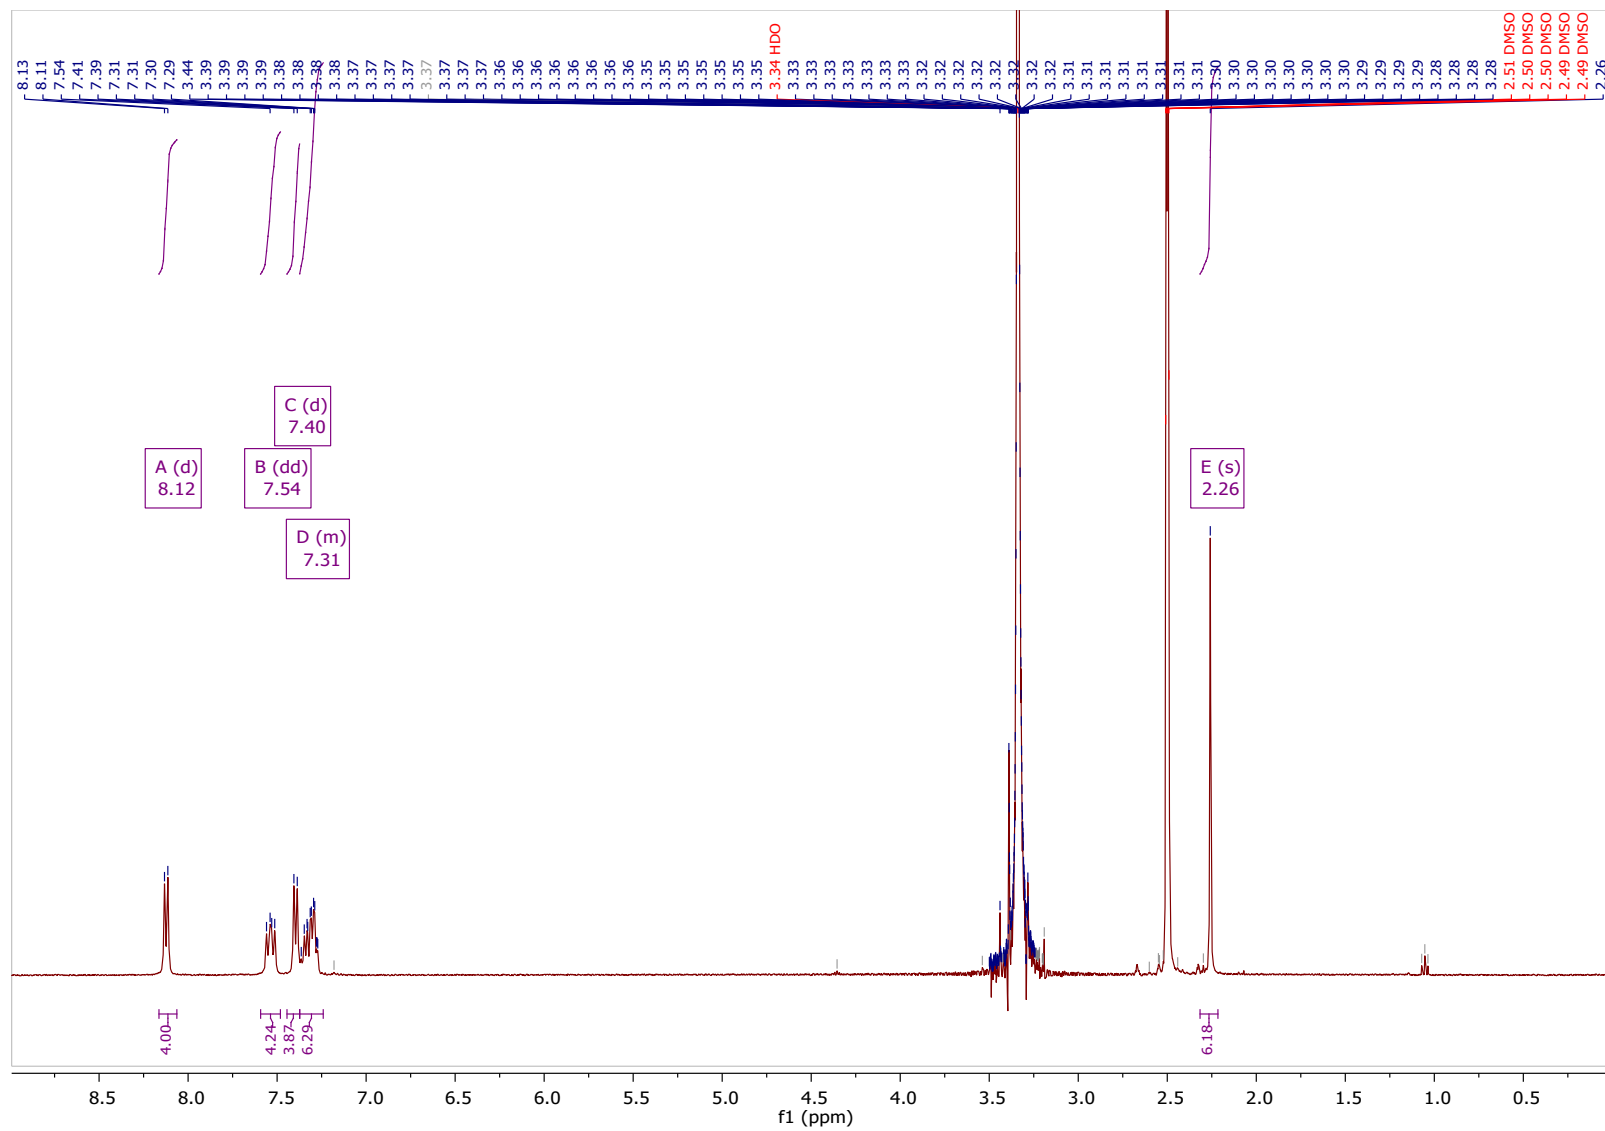

**Figure S21** <sup>1</sup>H NMR spectrum of complex [Bi(*p*-tol)<sub>2</sub>(O(O)PPh<sub>2</sub>)]<sub>n</sub> **11** in d<sub>6</sub>-DMSO.

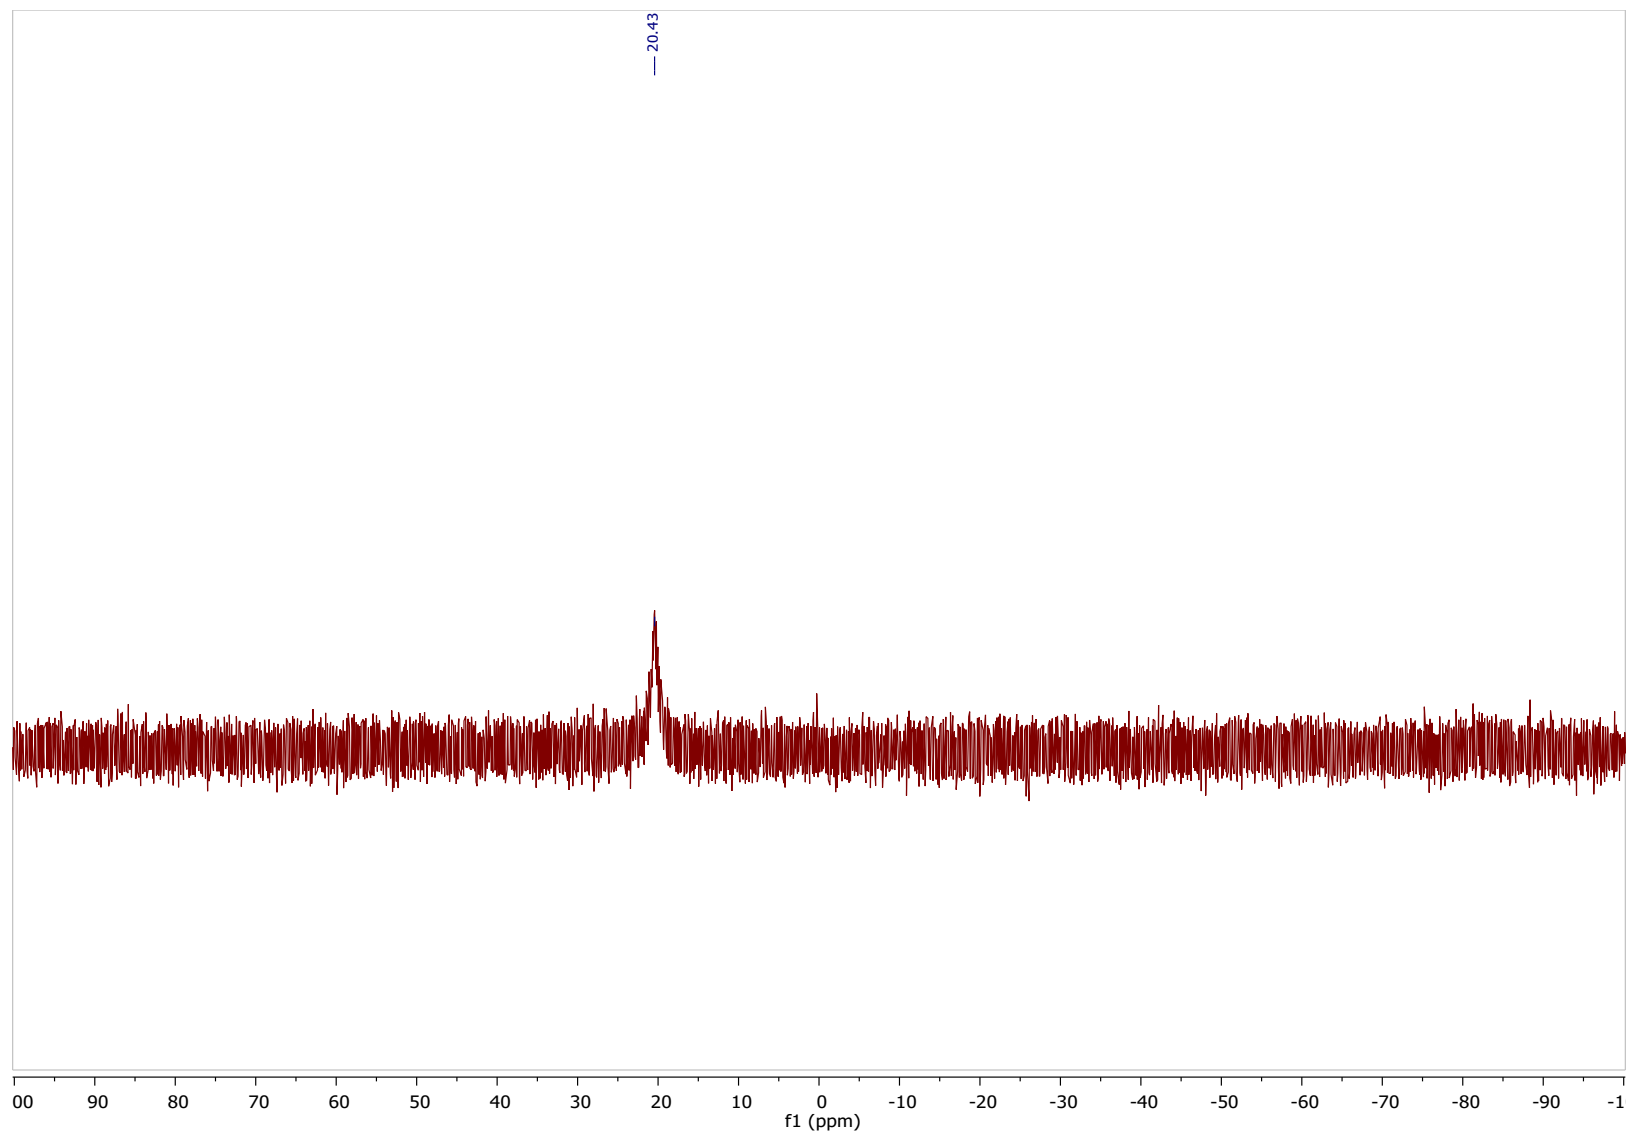

**Figure S22**  $^{31}\text{P}$  NMR spectrum of complex  $[\text{Bi}(p\text{-tol})_2(\text{O}(\text{O})\text{PPh}_2)]_n$  **11** in  $\text{d}_6\text{-DMSO}$ .



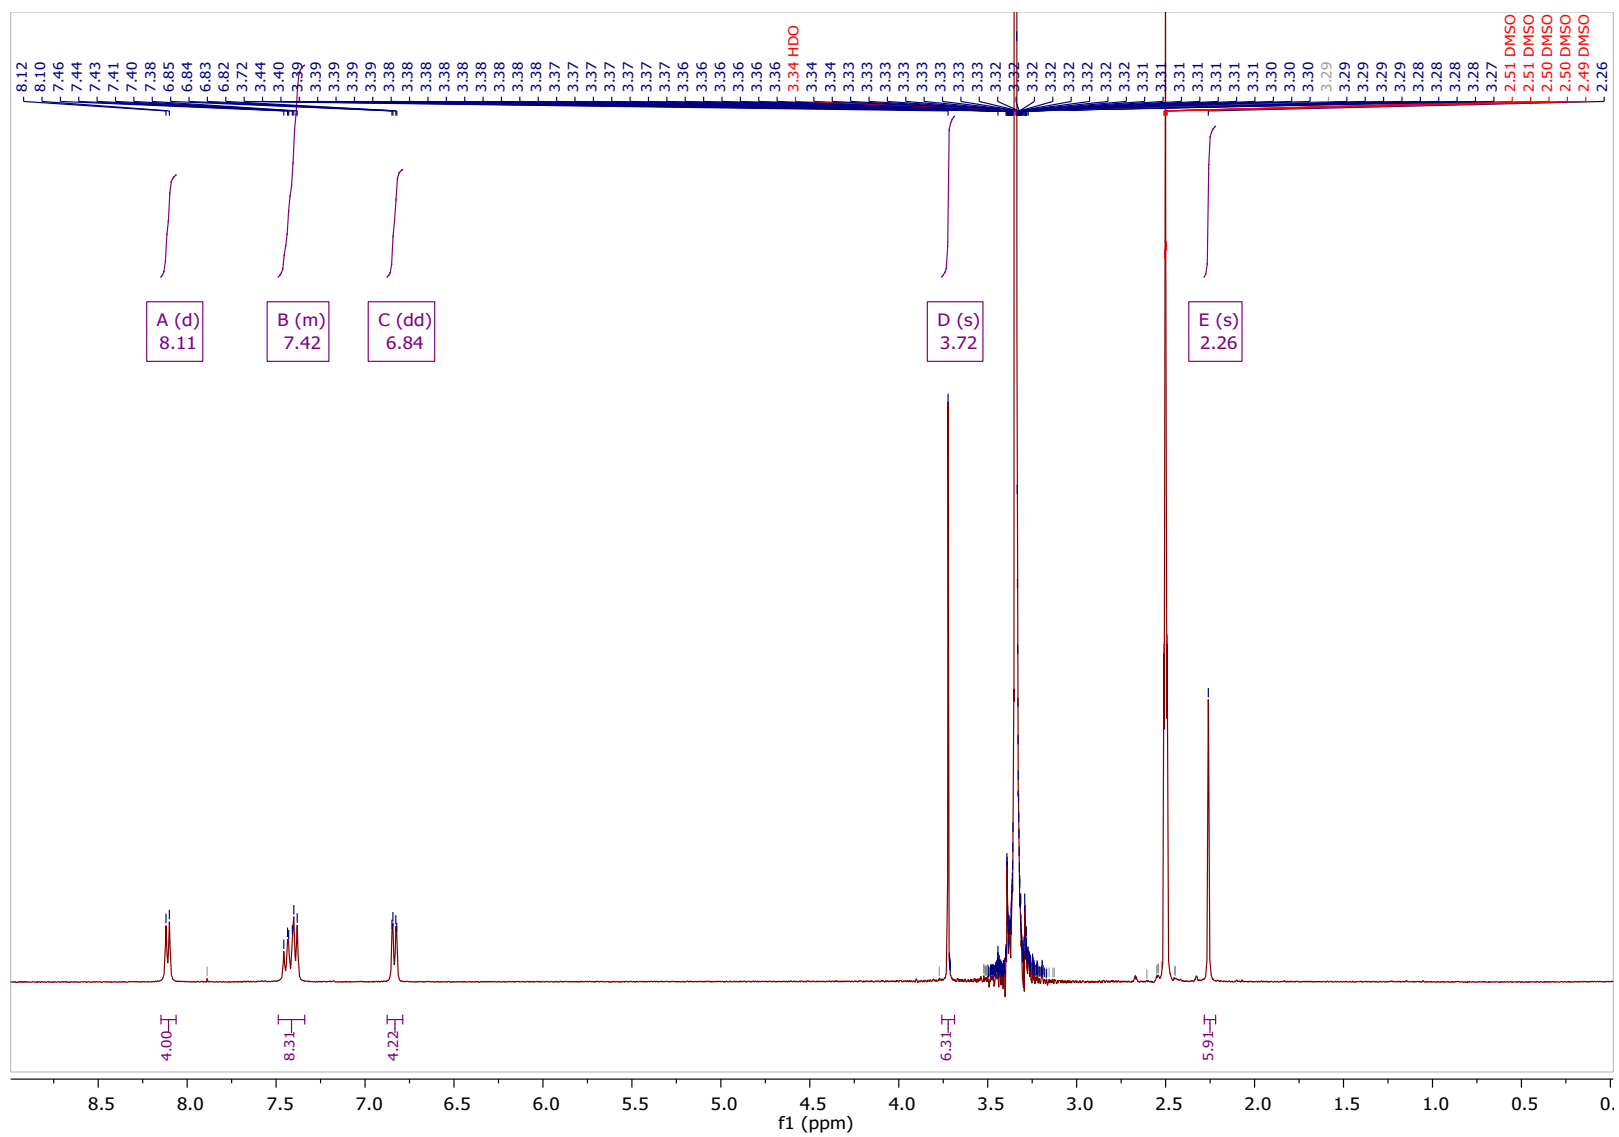

**Figure S23**  $^1\text{H}$  NMR spectrum of complex  $[\text{Bi}(\text{p-tol})_2(\text{O}(\text{O})\text{P}(\text{p-MeOPh})_2)]_n$  **12** in  $d_6$ -DMSO.

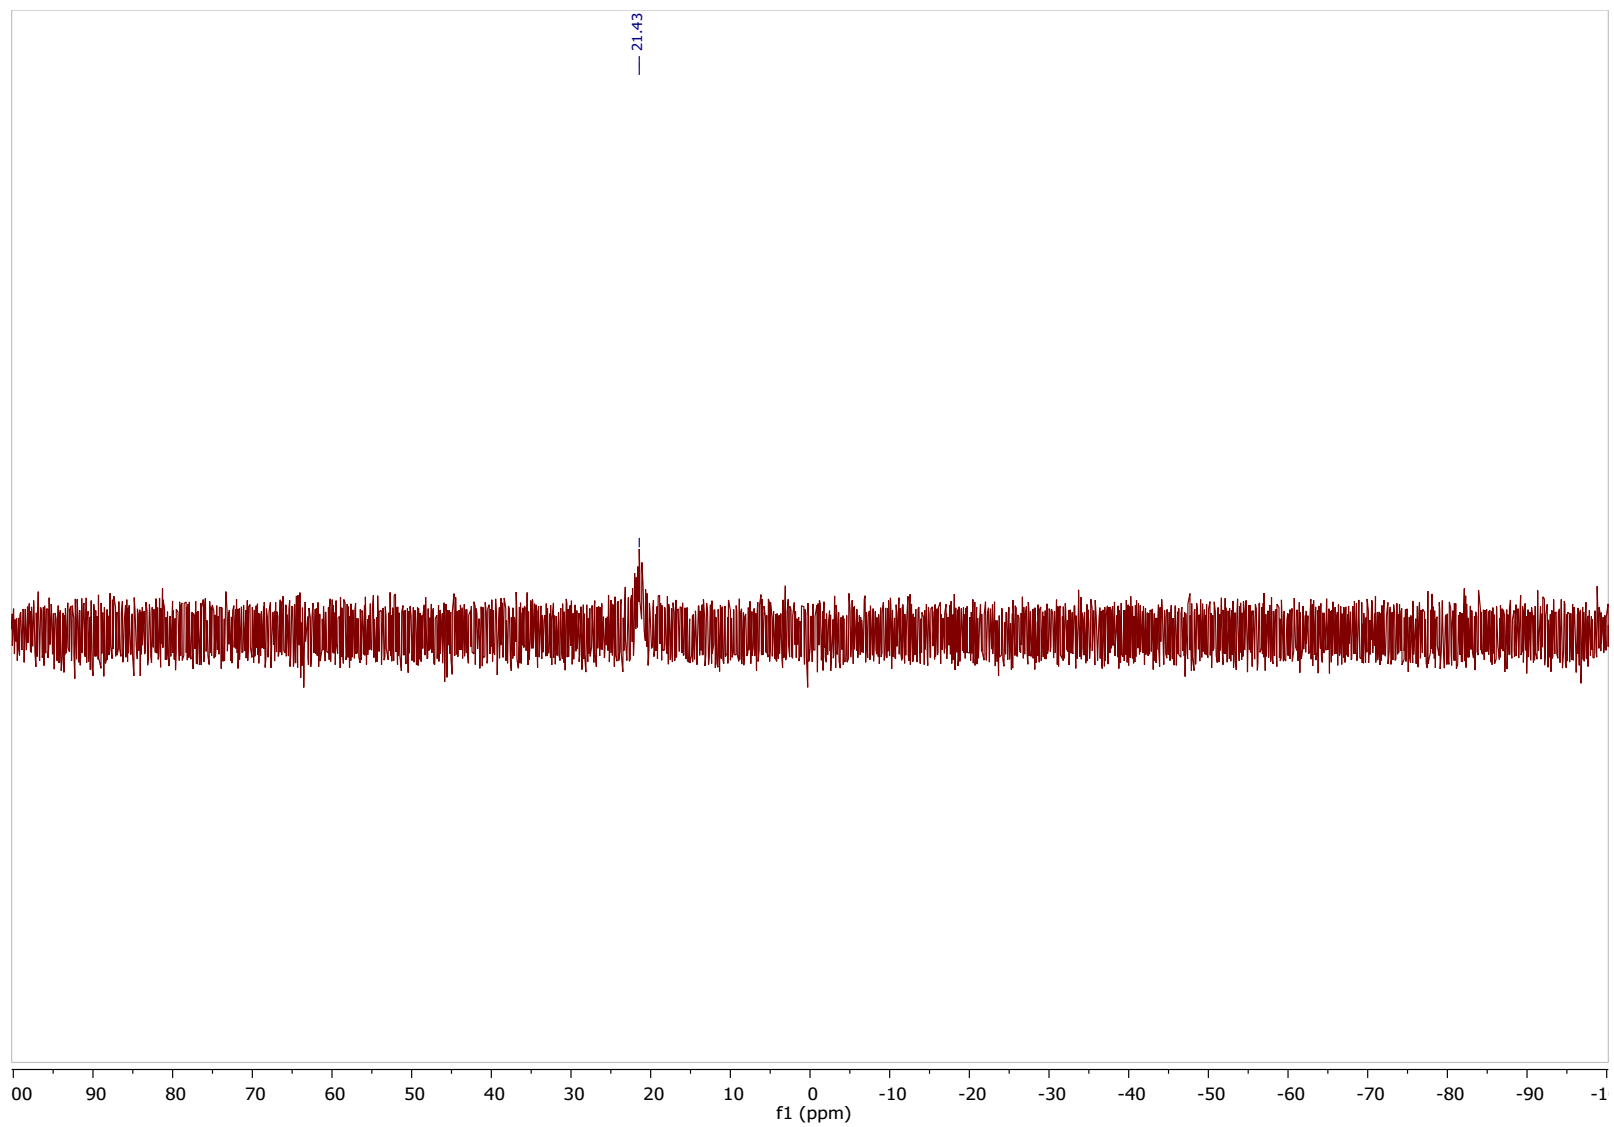

Figure S24  $^{31}\text{P}$  NMR spectrum of complex  $[\text{Bi}(\rho\text{-tol})_2(\text{O}(\text{O})\text{P}(\rho\text{-MeOPh})_2)]_n$  **12** in  $\text{d}_6\text{-DMSO}$ .

**Table S1** Characterisation of complexes **1** – **12** compared with their parent phosphinic acids including difference in asymmetric and symmetric PO<sub>2</sub> stretching as determined by IR, and melting temperatures as determined by DSC-TGA.

| Compound                                                                                 |           | $\Delta\nu$ (cm <sup>-1</sup> ) | Melting point (°C) |
|------------------------------------------------------------------------------------------|-----------|---------------------------------|--------------------|
| [Bi( <i>o</i> -MeOPh) <sub>2</sub> (O(O)P(H)Ph)] <sub>n</sub>                            | <b>1</b>  | 94, 105                         | 149*               |
| [Bi( <i>o</i> -MeOPh) <sub>2</sub> (O(O)PPh <sub>2</sub> )] <sub>n</sub>                 | <b>2</b>  | 110, 111                        | 177*               |
| [Bi( <i>o</i> -MeOPh) <sub>2</sub> (O(O)P( <i>p</i> -MeOPh) <sub>2</sub> )] <sub>n</sub> | <b>3</b>  | 107, 112                        | 186*               |
| [Bi( <i>m</i> -MeOPh) <sub>2</sub> (O(O)P(H)Ph)] <sub>n</sub>                            | <b>4</b>  | 91, 98                          | 127                |
| [Bi( <i>m</i> -MeOPh) <sub>2</sub> (O(O)PPh <sub>2</sub> )] <sub>n</sub>                 | <b>5</b>  | 111, 130                        | 161*               |
| [Bi( <i>m</i> -MeOPh) <sub>2</sub> (O(O)P( <i>p</i> -MeOPh) <sub>2</sub> )] <sub>n</sub> | <b>6</b>  | 92, 110                         | 151                |
| [Bi( <i>m</i> -tol) <sub>2</sub> (O(O)P(H)Ph)] <sub>n</sub>                              | <b>7</b>  | 90, 100                         | 139                |
| [Bi( <i>m</i> -tol) <sub>2</sub> (O(O)PPh <sub>2</sub> )] <sub>n</sub>                   | <b>8</b>  | 75, 98                          | 152                |
| [Bi( <i>m</i> -tol) <sub>2</sub> (O(O)P( <i>p</i> -MeOPh) <sub>2</sub> )] <sub>n</sub>   | <b>9</b>  | 98, 99                          | 239*               |
| [Bi( <i>p</i> -tol) <sub>2</sub> (O(O)P(H)Ph)] <sub>n</sub>                              | <b>10</b> | 108, 130                        | 156*               |
| [Bi( <i>p</i> -tol) <sub>2</sub> (O(O)PPh <sub>2</sub> )] <sub>n</sub>                   | <b>11</b> | 88, 93                          | 219*               |
| [Bi( <i>p</i> -tol) <sub>2</sub> (O(O)P( <i>p</i> -MeOPh) <sub>2</sub> )] <sub>n</sub>   | <b>12</b> | 101, 108                        | 188*               |
| Ph(H)P(O)OH                                                                              |           | 164                             |                    |
| Ph <sub>2</sub> P(O)OH                                                                   |           | 168                             |                    |
| ( <i>p</i> -MeOPh) <sub>2</sub> P(O)OH                                                   |           | 177                             |                    |

† Denotes solid-state <sup>31</sup>P NMR. \* Denotes decomposition point.

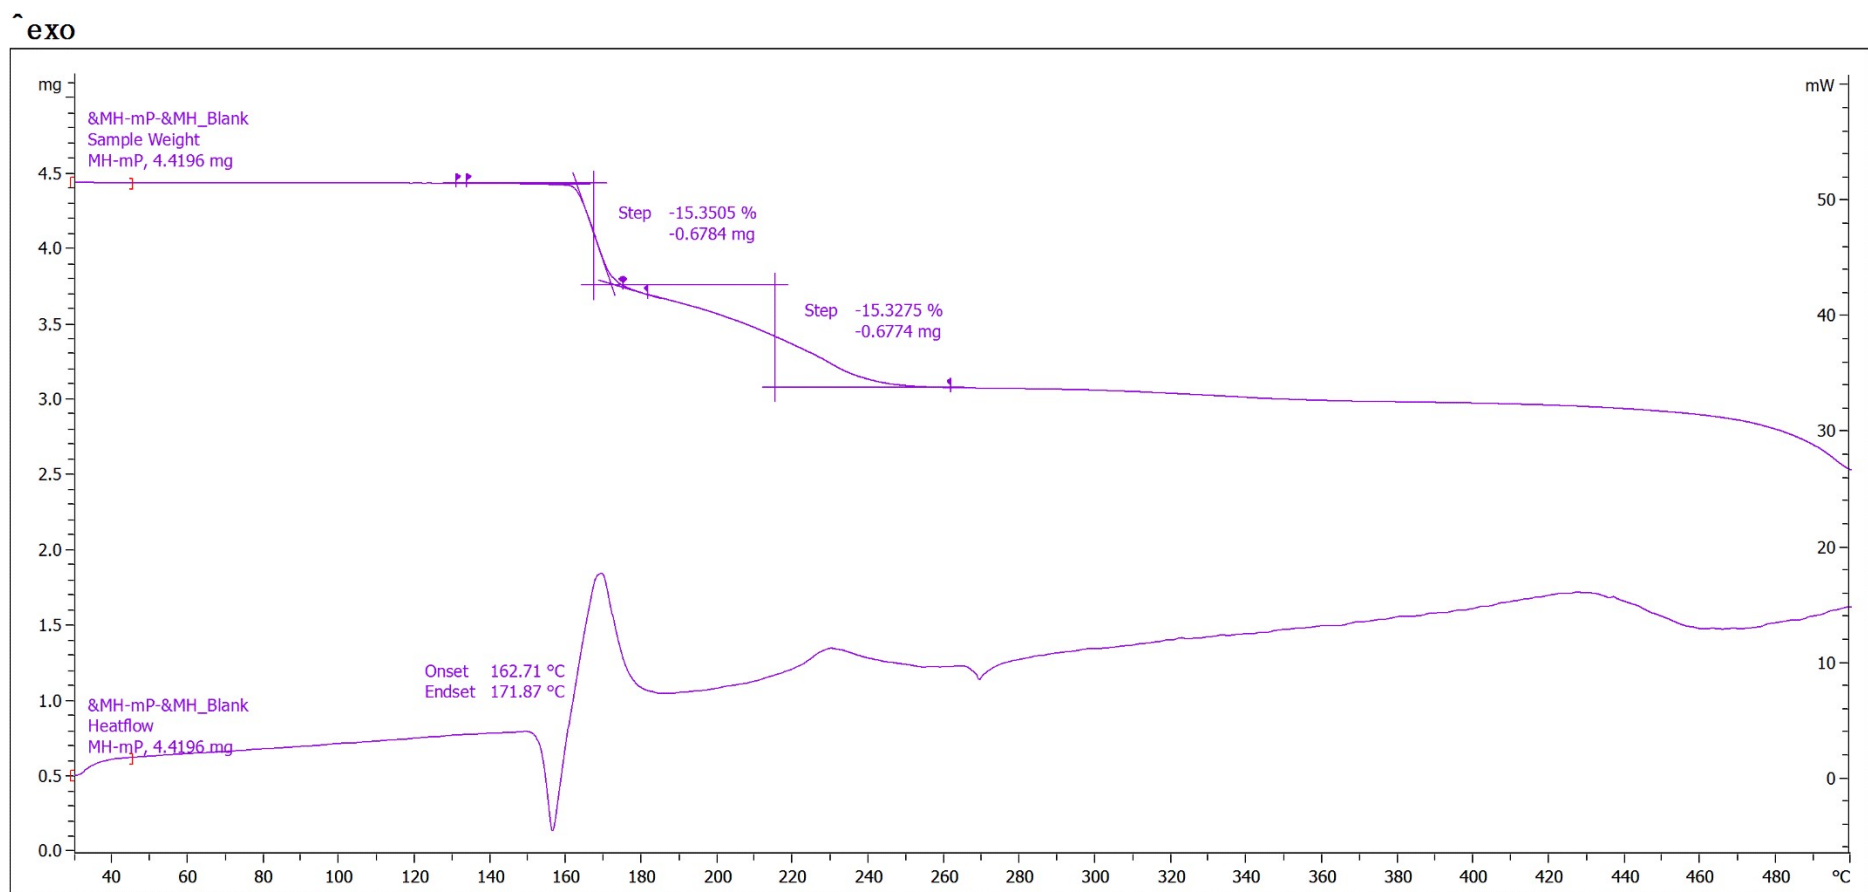

Lab: METTLER

STAR<sup>e</sup> SW 10.00

**Figure S25** TGA trace of complex  $[\text{Bi}(m\text{-MeOPh})_2\text{O}(\text{O})\text{P}(\text{H})\text{Ph}]_n$  **4**, showing the loss of two methoxyphenyl moieties. DSC trace is shown below.

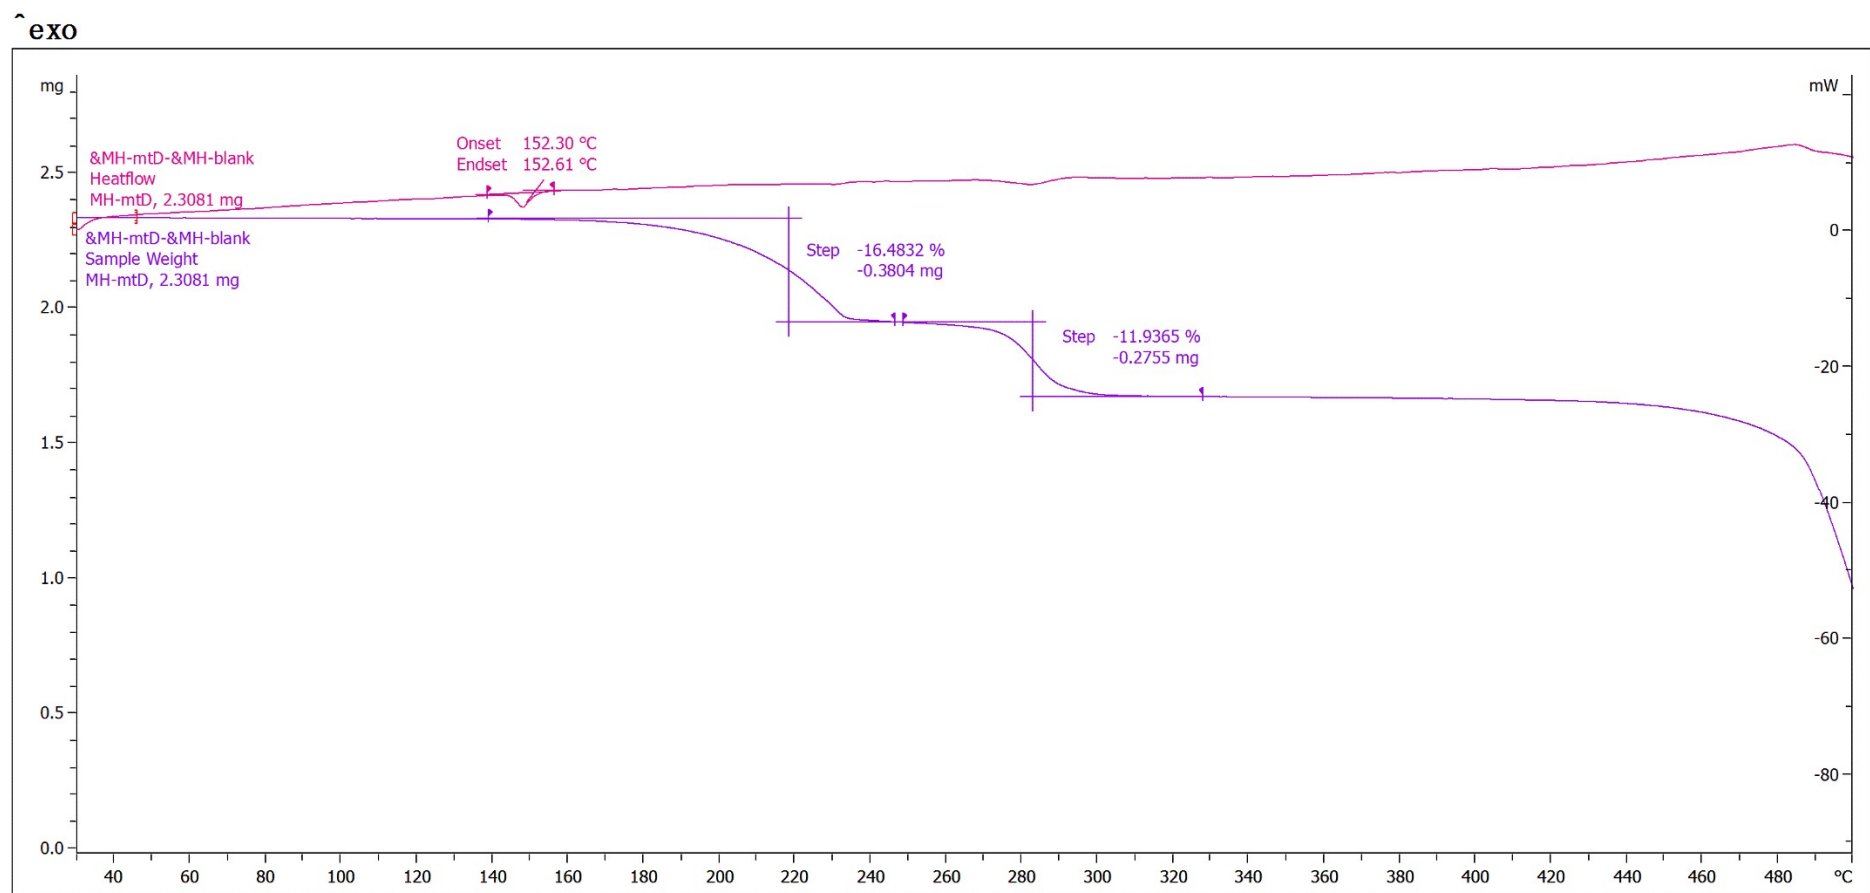

Lab: METTLER

STAR<sup>e</sup> SW 10.00

Figure S26 TGA trace (purple) of complex  $[\text{Bi}(m\text{-tol})_2(\text{O}(\text{O})\text{PPh}_2)]_n$  **8**, showing the loss of two tolyl moieties. DSC trace is shown in pink.

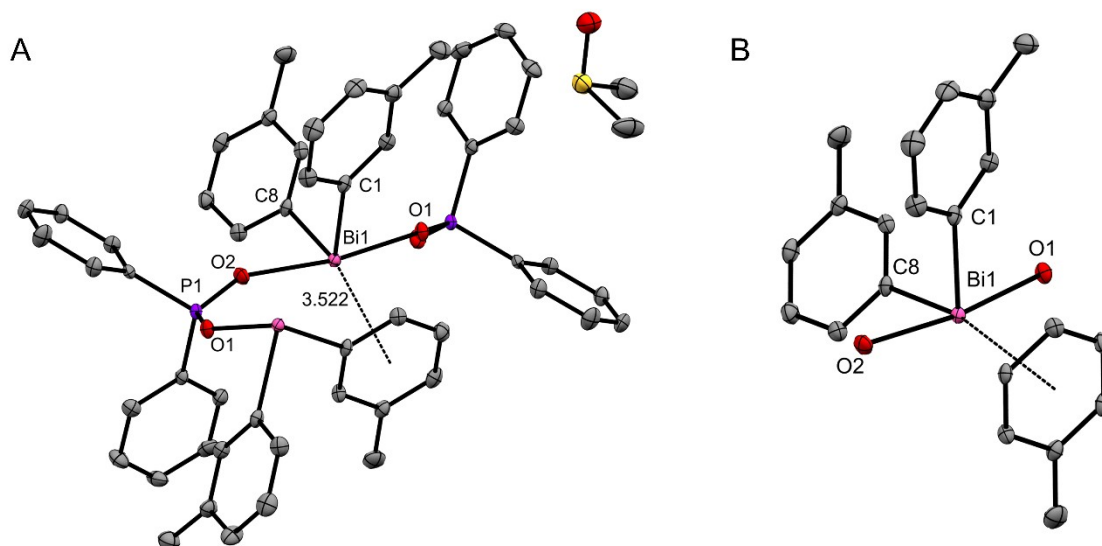

**Figure S27** Polymeric structure of  $([\text{Bi}(m\text{-tol})_2(\text{O}(\text{O})\text{PPh}_2)].\text{DMSO})_n$  **8** (A) with DMSO in the lattice, and geometry around the bismuth centre (B) showing the distorted square pyramidal confirmation with evidence of a sterically active lone pair. Thermal ellipsoids shown at 50 % probability with hydrogen atoms omitted for clarity. Selected bond lengths ( $\text{\AA}$ ) and angles ( $^\circ$ ): Bi1-O1 2.3238(17); Bi1-O2 2.3742(17); Bi1-C1 2.255(2); Bi1-C8 2.264(2); Bi1-arene<sub>centroid</sub> 3.522; O1-Bi1-O2 172.23(6); O1-Bi1-C1 86.30(8); O1-Bi1-C8 90.07(8); O2-Bi1-C1 88.51(8); O2-Bi1-C8 84.42(7); C1-Bi1-C8 92.93(9); C8-Bi1-arene<sub>centroid</sub> 169.04. Symmetry operator:  $(-x + 1/2, y + 1/2, -z + 1/2)$ .

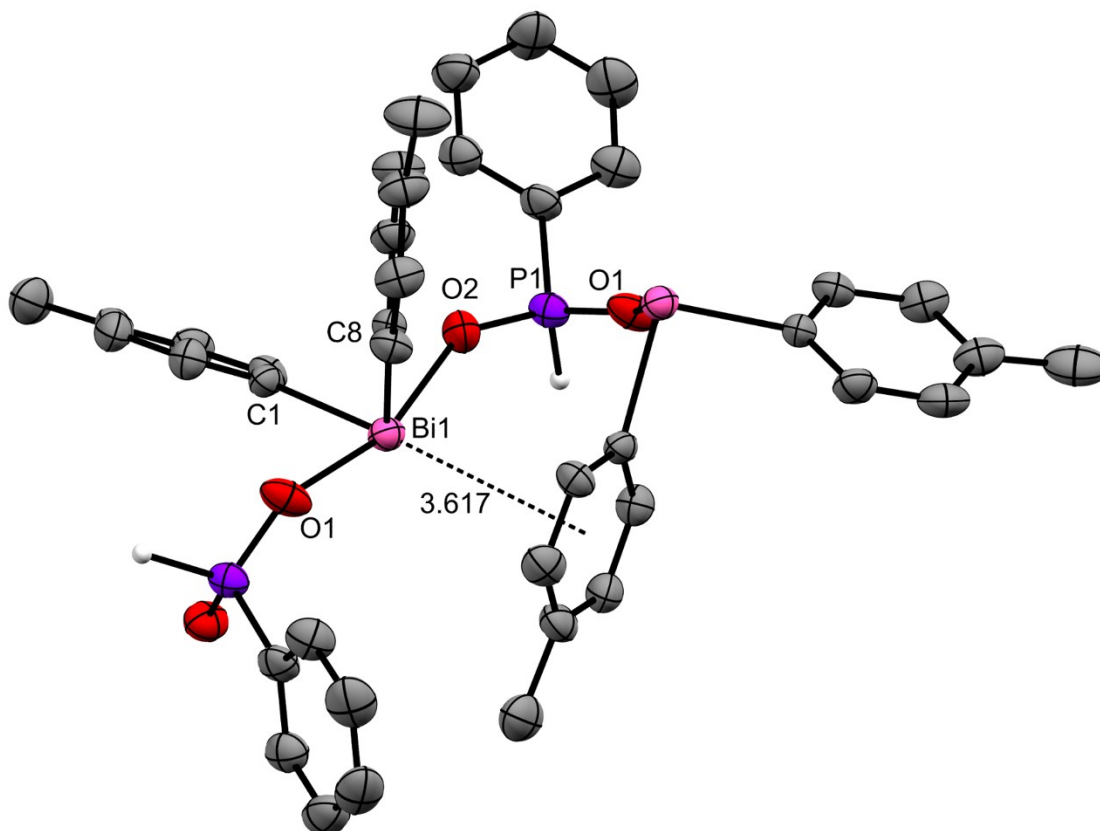

**Figure S28** Molecular structure of complex  $[\text{Bi}(p\text{-tol})_2(\text{O}(\text{O})\text{P}(\text{H})\text{Ph})]_n$  **10**. Thermal ellipsoids shown at 50 % probability with aromatic hydrogen atoms omitted for clarity. Selected bond lengths ( $\text{\AA}$ ) and angles ( $^\circ$ ): Bi1-O1 2.350(5); Bi1-O2 2.361(5); Bi1-C1 2.245(6); Bi1-C8 2.226(6); Bi1-arene<sub>centroid</sub> 3.617; O1-Bi1-O2 162.66(18); O1-Bi1-C1 86.2(2); O1-Bi1-C8 82.19(18); O2-Bi1-C1 82.60(19); O2-Bi1-C8 85.49(18); C1-Bi1-C8 94.5(2); C1-Bi1-arene<sub>centroid</sub> 171.25. Symmetry operator:  $(-x + 1/2, y - 1/2, -z + 3/2)$ .

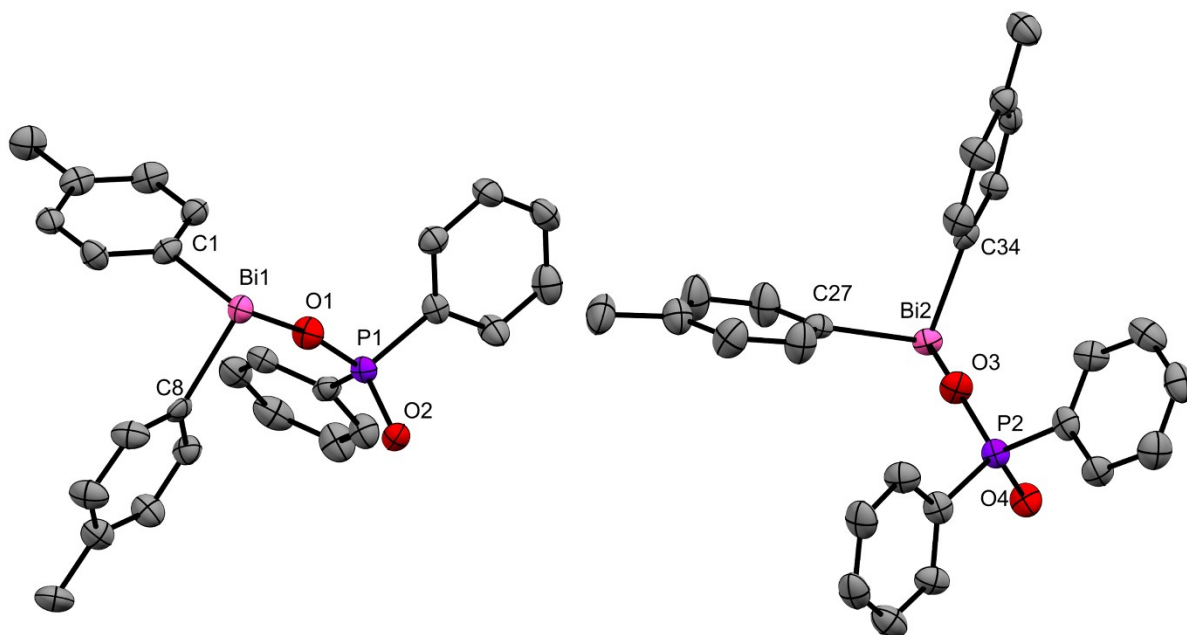

**Figure S29** Molecular structures of complex  $[\text{Bi}(p\text{-tol})_2(\text{O}(\text{O})\text{PPh}_2)]_n$  **11**. Thermal ellipsoids shown at 50 % probability with hydrogen atoms omitted for clarity. Selected bond lengths ( $\text{\AA}$ ) and angles ( $^\circ$ ): Bi1-O1 2.379(6); Bi1-O2 2.329(6); Bi1-C1 2.272(8); Bi1-C8 2.254(9); Bi1-arene<sub>centroid</sub> 3.429; Bi2-O3 2.355(6); Bi2-O4 2.361(6); Bi2-C27 2.262(9); Bi2-C34 2.249(10); Bi1-arene<sub>centroid</sub> 3.509; O1-Bi1-O2 172.1(2); O1-Bi1-C1 84.4(3); O1-Bi1-C8 90.2(3); O2-Bi1-C1 89.0(3); O2-Bi1-C8 85.5(3); C1-Bi1-C8 90.8(3); C1-Bi1-arene<sub>centroid</sub> 171.16; O3-Bi2-O4 171.2(2); O3-Bi2-C27 85.8(3); O3-Bi2-C34 86.4(3); O4-Bi2-C27 87.8(3); O4-Bi2-C34 88.0(3); C27-Bi2-C34 93.2(3); C27-Bi2-arene<sub>centroid</sub> 90.20. Symmetry operator: Bi1  $(-x + 1, y + 1/2, -z + 2)$  and Bi2  $(-x, y + 1/2, -z + 1)$ .

**Table S2** Minimum inhibitory concentrations (MICs) of triaryl bismuth reagents ( $\text{BiAr}_3$ ) to inhibit  $\geq 80\%$  growth of MRSA, VRE, *E. coli*, and *P. aeruginosa*, as measured by absorbance at 600 nm following overnight incubation at 37  $^\circ\text{C}$ .

| Compound                      | MIC ( $\mu\text{M}$ ) |       |                |                      |
|-------------------------------|-----------------------|-------|----------------|----------------------|
|                               | MRSA                  | VRE   | <i>E. coli</i> | <i>P. aeruginosa</i> |
| $\text{Bi}(o\text{-MeOPh})_3$ | > 100                 | > 100 | > 100          | > 100                |
| $\text{Bi}(m\text{-MeOPh})_3$ | > 100                 | > 100 | > 100          | > 100                |
| $\text{Bi}(m\text{-tol})_3$   | > 100                 | > 100 | > 100          | > 100                |
| $\text{Bi}(p\text{-tol})_3$   | > 50                  | > 50  | > 50           | > 50                 |



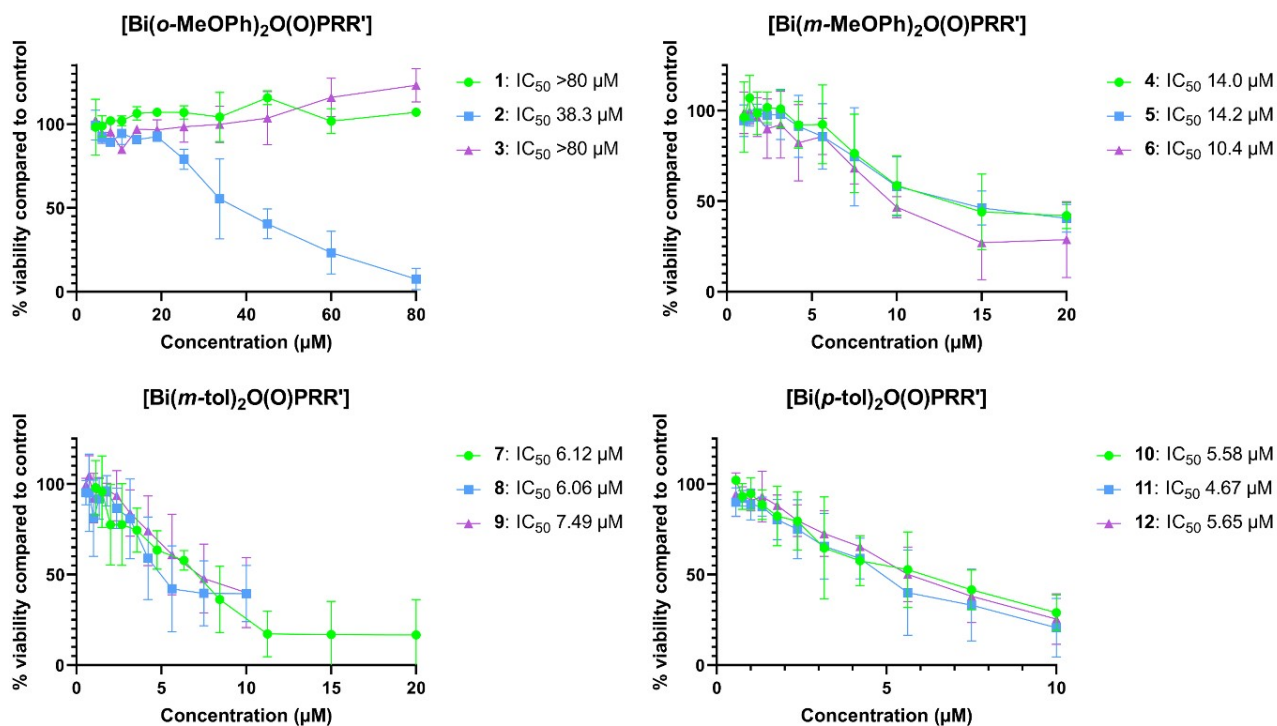

Figure S30 Cos-7 viability following 24 hour incubation at 37 °C, 5 % CO<sub>2</sub> with complexes 1 – 12.

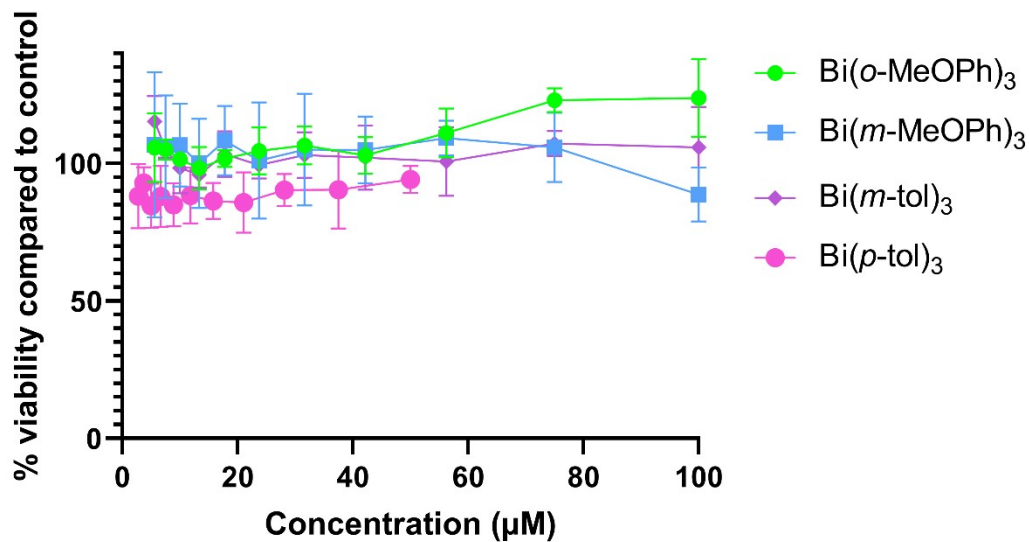

Figure S31 Cos-7 viability following 24 hour incubation at 37 °C, 5 % CO<sub>2</sub> with BiAr<sub>3</sub>.

**Table S3** Summary of crystallographic data for complexes **4**, **7**, **8**, **10** and **11**.

| Complex                       | [Bi( <i>m</i> -MeOPh) <sub>2</sub> O(O)P(H)Ph]<br><b>4</b> | [Bi( <i>m</i> -tol) <sub>2</sub> O(O)P(H)Ph]<br><b>7</b> | [Bi( <i>m</i> -tol) <sub>2</sub> O(O)PPh <sub>2</sub> ]<br>.DMSO <b>8</b>            | [Bi( <i>p</i> -tol) <sub>2</sub> O(O)P(H)Ph]<br><b>10</b> | [Bi( <i>p</i> -tol) <sub>2</sub> O(O)PPh <sub>2</sub> ]<br><b>11</b> |
|-------------------------------|------------------------------------------------------------|----------------------------------------------------------|--------------------------------------------------------------------------------------|-----------------------------------------------------------|----------------------------------------------------------------------|
| CCDC                          | 2130070                                                    | 2130069                                                  | 2130071                                                                              | 2130072                                                   | 2130073                                                              |
| Formula                       | C <sub>20</sub> H <sub>20</sub> BiO <sub>4</sub> P         | C <sub>20</sub> H <sub>20</sub> BiO <sub>2</sub> P       | C <sub>26</sub> H <sub>24</sub> BiO <sub>2</sub> P, C <sub>2</sub> H <sub>6</sub> OS | C <sub>20</sub> H <sub>20</sub> BiO <sub>2</sub> P        | C <sub>26</sub> H <sub>24</sub> BiO <sub>2</sub> P                   |
| Formula weight                | 564.31                                                     | 532.31                                                   | 686.53                                                                               | 532.31                                                    | 608.40                                                               |
| Crystal system                | Orthorhombic                                               | Monoclinic                                               | Monoclinic                                                                           | Monoclinic                                                | Monoclinic                                                           |
| Space group                   | P2 <sub>1</sub> 2 <sub>1</sub> 2 <sub>1</sub>              | P2 <sub>1</sub>                                          | P2 <sub>1</sub> /n                                                                   | C2/c                                                      | P2 <sub>1</sub>                                                      |
| <i>a</i> (Å)                  | 9.4175(4)                                                  | 8.7590(18)                                               | 14.2607(2)                                                                           | 18.7237(4)                                                | 11.7325(2)                                                           |
| <i>b</i> (Å)                  | 9.4368(3)                                                  | 9.4710(19)                                               | 10.1056(2)                                                                           | 9.2659(2)                                                 | 9.3795(2)                                                            |
| <i>c</i> (Å)                  | 21.9641(6)                                                 | 11.418(2)                                                | 18.4960(4)                                                                           | 23.2109(5)                                                | 10.9611(5)                                                           |
| α (°)                         | 90                                                         | 90                                                       | 90                                                                                   | 90                                                        | 90                                                                   |
| β (°)                         | 90                                                         | 99.95(3)                                                 | 95.6810(10)                                                                          | 107.783(5)                                                | 96.470(2)                                                            |
| γ (°)                         | 90                                                         | 90                                                       | 90                                                                                   | 90                                                        | 90                                                                   |
| Volume (Å <sup>3</sup> )      | 1951.97(12)                                                | 932.9(3)                                                 | 2652.42(9)                                                                           | 3834.50(15)                                               | 2291.97(8)                                                           |
| Z                             | 4                                                          | 2                                                        | 4                                                                                    | 8                                                         | 4                                                                    |
| Density (g cm <sup>-3</sup> ) | 1.920                                                      | 1.895                                                    | 1.719                                                                                | 1.844                                                     | 1.763                                                                |
| μ (mm <sup>-1</sup> )         | 9.136                                                      | 9.543                                                    | 6.813                                                                                | 18.902                                                    | 7.782                                                                |
| F <sub>000</sub>              | 1080                                                       | 508                                                      | 1344                                                                                 | 2032                                                      | 1176                                                                 |
| T (K)                         | 123(2)                                                     | 293(2)                                                   | 123.00(10)                                                                           | 122.99(10)                                                | 123.00(10)                                                           |
| 2θ <sub>max</sub> (°)         | 56.6                                                       | 57.1                                                     | 62.1                                                                                 | 160.0                                                     | 52.7                                                                 |
| Reflections collected         | 18660                                                      | 11397                                                    | 34988                                                                                | 20042                                                     | 25295                                                                |
| Unique reflections            | 4810 (R <sub>int</sub> = 0.0462)                           | 3692 (R <sub>int</sub> = 0.0198)                         | 7568 (R <sub>int</sub> = 0.0455)                                                     | 4101 (R <sub>int</sub> = 0.0622)                          | 9013 (R <sub>int</sub> = 0.0373)                                     |
| Final Goof                    | 1.044                                                      | 1.173                                                    | 1.083                                                                                | 1.031                                                     | 1.013                                                                |
| R <sub>1</sub>                | 0.0264                                                     | 0.0184                                                   | 0.0240                                                                               | 0.0386                                                    | 0.0310                                                               |
| wR <sub>2</sub> (all data)    | 0.0482                                                     | 0.0475                                                   | 0.0574                                                                               | 0.1282                                                    | 0.0789                                                               |
| Flack parameter               | -0.038(6)                                                  | -0.017(3)                                                | -                                                                                    | -                                                         | -0.021(5)                                                            |
